# Supplementary material for: Developmental Alterations of Colonic microRNA Profiles Imply Potential Biological Functions in Kid Goats
Source: MDPI journal article supplement (doi:10.3390/ani12121533), 2022-06-14
Supplement: s1 [file s1]

**Table S1 Primer sequences for real-time PCR**

| miRNA                  | Primer      | Sequence                   |
|------------------------|-------------|----------------------------|
| <i>U6</i>              | Up primer   | CGCTTCGGCAGCACATATAC       |
|                        | Down primer | TCACGAATTTGCGTGTCAT        |
| <i>chi-let-7b-5p</i>   | Up primer   | CCGTGAGGTAGTAGGTTGTGTGGTT  |
| <i>chi-miR-107-3p</i>  | Up primer   | CGAGCAGCATTGTACAGGGCTAT    |
| <i>chi-miR-30b-5p</i>  | Up primer   | CCGCTGTAAACATCCTACACTCAGCT |
| <i>chi-miR-1271-3p</i> | Up primer   | CGTCACAGTGAACCGGTCTCTTT    |
| <i>chi-miR-92a-5p</i>  | Up primer   | AGGTTGGGATCAGTTGCAATGCT    |
| <i>chi-miR-412-3p</i>  | Up primer   | TATACGCTTCACCTGGTCCACTAGC  |

**Table S2:** Overview of reads from raw data to cleaned sequences of small RNA sequences.

| Type               | D10_1  |           | D10_2   |           | D10_3   |           | D10_4   |           | D10_5  |           |
|--------------------|--------|-----------|---------|-----------|---------|-----------|---------|-----------|--------|-----------|
|                    | Uniq   | % of uniq | Uniq    | % of uniq | Uniq    | % of uniq | Uniq    | % of uniq | Uniq   | % of uniq |
| Raw reads          | 863442 | 100.00    | 1023031 | 100.00    | 1349392 | 100.00    | 1307004 | 100.00    | 949935 | 100.00    |
| 3ADT&length filter | 476498 | 55.19     | 547130  | 53.48     | 793297  | 58.79     | 848030  | 64.88     | 544110 | 57.28     |
| Junk reads         | 6163   | 0.71      | 7110    | 0.69      | 6798    | 0.50      | 6861    | 0.52      | 5921   | 0.62      |
| Rfam               | 11680  | 1.35      | 12669   | 1.24      | 14641   | 1.09      | 14884   | 1.14      | 12709  | 1.34      |
| mRNA               | 18716  | 2.17      | 17626   | 1.72      | 21711   | 1.61      | 18720   | 1.43      | 14504  | 1.53      |
| Repeats            | 1324   | 0.15      | 1582    | 0.15      | 1753    | 0.13      | 1931    | 0.15      | 1634   | 0.17      |
| Valid reads        | 353058 | 40.89     | 440934  | 43.10     | 515858  | 38.23     | 421672  | 32.26     | 375327 | 39.51     |

| Type               | D25_1  |           | D25_2  |           | D25_3   |           | D25_4   |           | D25_5   |           |
|--------------------|--------|-----------|--------|-----------|---------|-----------|---------|-----------|---------|-----------|
|                    | Uniq   | % of uniq | Uniq   | % of uniq | Uniq    | % of uniq | Uniq    | % of uniq | Uniq    | % of uniq |
| Raw reads          | 998568 | 100.00    | 917367 | 100.00    | 1489136 | 100.00    | 1064340 | 100.00    | 1187114 | 100.00    |
| 3ADT&length filter | 518623 | 51.94     | 512348 | 55.85     | 759610  | 51.01     | 626571  | 58.87     | 539346  | 45.43     |
| Junk reads         | 8583   | 0.86      | 4263   | 0.46      | 12349   | 0.83      | 6927    | 0.65      | 9931    | 0.84      |
| Rfam               | 11863  | 1.19      | 10411  | 1.13      | 16740   | 1.12      | 14807   | 1.39      | 14443   | 1.22      |
| mRNA               | 16088  | 1.61      | 15852  | 1.73      | 27692   | 1.86      | 20096   | 1.89      | 22255   | 1.87      |
| Repeats            | 1305   | 0.13      | 1338   | 0.15      | 1686    | 0.11      | 1561    | 0.15      | 1697    | 0.14      |
| Valid reads        | 445955 | 44.66     | 376668 | 41.06     | 676188  | 45.41     | 398934  | 37.48     | 604124  | 50.89     |

| Type               | D31_1   |           | D31_2   |           | D31_3   |           | D31_4   |           | D31_5   |           |
|--------------------|---------|-----------|---------|-----------|---------|-----------|---------|-----------|---------|-----------|
|                    | Uniq    | % of uniq |
| Raw reads          | 1215693 | 100.00    | 1090285 | 100.00    | 1058913 | 100.00    | 1546792 | 100.00    | 1800286 | 100.00    |
| 3ADT&length filter | 601086  | 49.44     | 550849  | 50.52     | 502707  | 47.47     | 685778  | 44.34     | 1028346 | 57.12     |
| Junk reads         | 9399    | 0.77      | 6572    | 0.60      | 7709    | 0.73      | 14981   | 0.97      | 13989   | 0.78      |
| Rfam               | 15045   | 1.24      | 14985   | 1.37      | 11486   | 1.08      | 18371   | 1.19      | 16436   | 0.91      |
| mRNA               | 22095   | 1.82      | 19174   | 1.76      | 18500   | 1.75      | 35054   | 2.27      | 30393   | 1.69      |
| Repeats            | 1606    | 0.13      | 1488    | 0.14      | 1442    | 0.14      | 2103    | 0.14      | 1900    | 0.11      |
| Valid reads        | 570984  | 46.97     | 501582  | 46.00     | 521044  | 49.21     | 796524  | 51.50     | 714684  | 39.70     |

**Table S3:** Information of the highly expressed miRNAs in the goat colon of three different periods.

| miR_name       | Sequence                    | D10_1<br>(norm) | D10_2<br>(norm) | D10_3<br>(norm) | D10_4<br>(norm) | D10_5<br>(norm) | D25_1<br>(norm) | D25_2<br>(norm) | D25_3<br>(norm) | D25_4<br>(norm) | D25_5<br>(norm) | D31_1<br>(norm) | D31_2<br>(norm) | D31_3<br>(norm) | D31_4<br>(norm) | D31_5<br>(norm) |
|----------------|-----------------------------|-----------------|-----------------|-----------------|-----------------|-----------------|-----------------|-----------------|-----------------|-----------------|-----------------|-----------------|-----------------|-----------------|-----------------|-----------------|
| chi-let-7f-5p  | TGAGGTAGTAGAT<br>TGTATAGTT  | 31245.<br>66    | 31577.<br>41    | 24545.<br>72    | 22108.<br>92    | 40557.<br>50    | 31878.<br>85    | 68705.<br>39    | 37339.<br>47    | 31208.<br>06    | 27579.<br>35    | 28455.<br>72    | 29908.<br>99    | 24931.<br>13    | 17577.<br>23    | 23287.<br>28    |
| chi-let-7d-5p  | AGAGGTAGTAGGT<br>TGCATAGTT  | 17727.<br>73    | 20104.<br>59    | 18721.<br>97    | 21742.<br>38    | 19750.<br>87    | 19055.<br>95    | 18598.<br>87    | 19642.<br>49    | 19593.<br>06    | 21274.<br>85    | 22562.<br>20    | 20098.<br>75    | 19962.<br>66    | 19492.<br>20    | 16406.<br>29    |
| chi-let-7d-3p  | CTATACGACCTGC<br>TGCCTTTCT  | 4844.6<br>1     | 7089.7<br>3     | 6341.1<br>9     | 6762.0<br>8     | 5883.0<br>3     | 3801.4<br>7     | 14170.<br>87    | 6507.7<br>6     | 5145.3<br>6     | 9214.9<br>8     | 5528.7<br>3     | 7017.1<br>3     | 6903.8<br>0     | 7994.4<br>9     | 5557.4<br>7     |
| chi-let-7e-5p  | TGAGGTAGGAGGT<br>TGTATAGTT  | 32213.<br>65    | 40306.<br>38    | 40948.<br>79    | 39775.<br>16    | 33621.<br>36    | 32349.<br>50    | 34276.<br>18    | 31642.<br>95    | 39923.<br>47    | 33233.<br>69    | 41543.<br>94    | 50541.<br>23    | 36741.<br>77    | 29093.<br>51    | 27127.<br>68    |
| chi-let-7a-5p  | TGAGGTAGTAGGT<br>TGTGTGGTT  | 273674<br>.80   | 308517<br>.33   | 296359<br>.97   | 317003<br>.02   | 330373<br>.78   | 311181<br>.55   | 521287<br>.55   | 306841<br>.98   | 352508<br>.62   | 303980<br>.85   | 399522<br>.55   | 392244<br>.07   | 339988<br>.32   | 255973<br>.03   | 245615<br>.70   |
| chi-let-7i-5p  | TGAGGTAGTAGTT<br>TGTGCTGTT  | 32712.<br>21    | 31512.<br>86    | 26314.<br>27    | 25278.<br>73    | 34437.<br>59    | 31221.<br>13    | 79115.<br>93    | 37108.<br>08    | 29293.<br>70    | 28501.<br>77    | 28455.<br>99    | 31761.<br>57    | 27101.<br>97    | 22835.<br>44    | 20823.<br>23    |
| chi-let-7g-5p  | TGAGGTAGTAGTT<br>TGTACAGTT  | 20827.<br>40    | 27945.<br>82    | 19867.<br>21    | 20364.<br>65    | 31014.<br>77    | 20261.<br>49    | 53386.<br>92    | 22753.<br>72    | 24312.<br>68    | 20075.<br>23    | 24907.<br>09    | 27355.<br>42    | 20522.<br>19    | 15088.<br>47    | 16710.<br>72    |
| chi-let-7c-5p  | TGAGGTAGTAGGT<br>TGTATGGTT  | 19998.<br>78    | 19328.<br>18    | 22494.<br>28    | 25363.<br>75    | 15374.<br>01    | 17784.<br>34    | 27865.<br>21    | 14034.<br>72    | 20558.<br>67    | 15736.<br>86    | 22688.<br>46    | 29583.<br>58    | 24529.<br>86    | 19915.<br>93    | 15916.<br>33    |
| chi-let-7b-5p  | TGAGGTAGTAGGT<br>TGTGTGGTT  | 176240<br>.70   | 173168<br>.72   | 187498<br>.46   | 222957<br>.97   | 151793<br>.56   | 227617<br>.78   | 245458<br>.22   | 194446<br>.03   | 201309<br>.73   | 256727<br>.74   | 242442<br>.15   | 267225<br>.59   | 239427<br>.19   | 275758<br>.49   | 213294<br>.50   |
| chi-miR-10a-5p | TACCCTGTAGATC<br>CGAATTTGT  | 61275.<br>44    | 62140.<br>88    | 37246.<br>00    | 27586.<br>79    | 28542.<br>14    | 68528.<br>90    | 324180<br>.62   | 59130.<br>15    | 66710.<br>19    | 48078.<br>30    | 40605.<br>32    | 71483.<br>46    | 62414.<br>76    | 28559.<br>75    | 54096.<br>73    |
| chi-miR-10b-5p | TACCCTGTAGAAC<br>CGAATTTGT  | 83940.<br>80    | 144259<br>.68   | 65070.<br>37    | 50191.<br>29    | 107257<br>.26   | 112533<br>.55   | 496302<br>.40   | 115090<br>.28   | 122741<br>.97   | 71568.<br>14    | 91293.<br>33    | 124972<br>.55   | 94762.<br>61    | 36804.<br>97    | 109924<br>.35   |
| chi-miR-15b-5p | TAGCAGCACATCA<br>TGGTTTACA  | 11208.<br>64    | 13415.<br>82    | 14560.<br>07    | 14409.<br>52    | 9032.5<br>9     | 15375.<br>47    | 6677.4<br>4     | 11321.<br>83    | 15858.<br>47    | 14897.<br>83    | 17803.<br>06    | 12090.<br>30    | 17598.<br>22    | 18493.<br>66    | 16968.<br>02    |
| chi-miR-16a-5p | TAGCAGCACGTAA<br>ATATTGGAG  | 35752.<br>62    | 34798.<br>93    | 33487.<br>76    | 35944.<br>45    | 38726.<br>32    | 45266.<br>57    | 15268.<br>46    | 41279.<br>50    | 42988.<br>96    | 37575.<br>85    | 54593.<br>67    | 42767.<br>59    | 45125.<br>23    | 32024.<br>41    | 37342.<br>72    |
| chi-miR-16b-5p | TAGCAGCACGTAA<br>ATATTGGGGT | 35517.<br>99    | 35954.<br>43    | 34295.<br>88    | 29418.<br>16    | 28622.<br>87    | 45564.<br>78    | 17434.<br>25    | 44566.<br>09    | 45192.<br>76    | 43874.<br>74    | 51678.<br>97    | 43648.<br>03    | 46939.<br>85    | 39158.<br>87    | 42668.<br>67    |
| chi-miR-21-5p  | TAGCTTATCAGAC<br>TGATGTTGAC | 74169.<br>93    | 45746.<br>10    | 38806.<br>10    | 31978.<br>46    | 75424.<br>49    | 101040<br>.06   | 93761.<br>21    | 161189<br>.87   | 46105.<br>82    | 59979.<br>95    | 50154.<br>74    | 40877.<br>89    | 51023.<br>21    | 41172.<br>61    | 63962.<br>63    |

|                |                              |               |               |               |               |               |                |               |               |                |               |                |               |               |                |               |
|----------------|------------------------------|---------------|---------------|---------------|---------------|---------------|----------------|---------------|---------------|----------------|---------------|----------------|---------------|---------------|----------------|---------------|
| chi-miR-22-3p  | AAGCTGCCAGTTG<br>AAGAACTGT   | 22087.<br>56  | 16599.<br>82  | 18985.<br>88  | 22805.<br>15  | 23012.<br>22  | 26298.<br>75   | 19557.<br>26  | 29765.<br>13  | 22556.<br>97   | 19791.<br>59  | 19415.<br>33   | 15278.<br>96  | 17003.<br>36  | 14130.<br>40   | 17773.<br>66  |
| chi-miR-23a    | ATCACATTGCCAG<br>GGATTTCCA   | 82978.<br>49  | 65670.<br>25  | 78868.<br>63  | 66701.<br>42  | 64283.<br>02  | 110036.<br>.40 | 51555.<br>06  | 95555.<br>34  | 103646.<br>.03 | 80819.<br>71  | 113583.<br>.50 | 95078.<br>51  | 95547.<br>00  | 103799.<br>.89 | 87428.<br>33  |
| chi-miR-23b-3p | ATCACATTGCCAG<br>GGATTACCAC  | 133104<br>.20 | 131714<br>.13 | 156157<br>.08 | 138250<br>.22 | 138852<br>.26 | 147873<br>.90  | 93665.<br>43  | 115966<br>.83 | 192298<br>.40  | 144988<br>.38 | 209574<br>.50  | 204187<br>.50 | 165829<br>.17 | 163783<br>.52  | 135452<br>.42 |
| chi-miR-24-3p  | TGGCTCAGTTCAG<br>CAGGAACAGT  | 40784.<br>83  | 32631.<br>91  | 36585.<br>00  | 38759.<br>81  | 38466.<br>37  | 45744.<br>37   | 22724.<br>22  | 33964.<br>00  | 41356.<br>99   | 37496.<br>74  | 43184.<br>03   | 41366.<br>71  | 39540.<br>64  | 36327.<br>18   | 36777.<br>58  |
| chi-miR-25-3p  | CATTGCACTTGTCT<br>CGGTCTGA   | 50610.<br>48  | 55247.<br>98  | 68050.<br>82  | 63119.<br>16  | 74336.<br>78  | 45852.<br>03   | 58881.<br>21  | 58094.<br>53  | 60706.<br>49   | 53001.<br>72  | 72787.<br>13   | 76805.<br>29  | 63806.<br>22  | 47145.<br>46   | 46415.<br>37  |
| chi-miR-26a-5p | TTCAAGTAATCCA<br>GGATAGGCT   | 290462<br>.96 | 208818<br>.18 | 253956<br>.68 | 249888<br>.01 | 277753<br>.75 | 279325<br>.25  | 389337<br>.65 | 262252<br>.32 | 309618<br>.50  | 212521<br>.57 | 329445<br>.51  | 350132<br>.17 | 322036<br>.37 | 179724<br>.71  | 214181<br>.88 |
| chi-miR-26b-5p | TTCAAGTAATTCA<br>GGATAGGTT   | 18240.<br>92  | 15065.<br>23  | 13079.<br>89  | 12754.<br>99  | 17737.<br>36  | 17301.<br>93   | 9211.6<br>4   | 13334.<br>40  | 17061.<br>57   | 12223.<br>52  | 16673.<br>81   | 13915.<br>83  | 13812.<br>30  | 11225.<br>95   | 13402.<br>87  |
| chi-miR-27b-3p | TTCACAGTGGCTA<br>AGTTCTGC    | 196235<br>.00 | 194481<br>.06 | 185781<br>.28 | 197366<br>.55 | 304629<br>.28 | 159991<br>.92  | 508343<br>.24 | 140905<br>.10 | 179853<br>.30  | 151888<br>.49 | 186223<br>.19  | 197298<br>.71 | 174079<br>.39 | 126295<br>.61  | 124029<br>.06 |
| chi-miR-27a-3p | TTCACAGTGGCTA<br>AGTTCTGCT   | 20014.<br>11  | 13022.<br>15  | 15879.<br>62  | 16467.<br>05  | 19137.<br>81  | 24138.<br>39   | 12577.<br>18  | 18811.<br>44  | 15647.<br>86   | 16372.<br>19  | 18301.<br>44   | 14880.<br>73  | 17844.<br>05  | 17755.<br>05   | 16910.<br>35  |
| chi-miR-28-3p  | CACTAGATTGAGA<br>GCTCCTGGA   | 15879.<br>60  | 16288.<br>16  | 15023.<br>14  | 14849.<br>37  | 15532.<br>23  | 14658.<br>05   | 47860.<br>70  | 18328.<br>23  | 14833.<br>64   | 18357.<br>78  | 17489.<br>08   | 17543.<br>77  | 18095.<br>50  | 18356.<br>02   | 15894.<br>97  |
| chi-miR-29a-3p | TAGCACCATCTGA<br>AATCGGTTA   | 10120.<br>24  | 8025.6<br>2   | 7902.5<br>2   | 7020.5<br>5   | 9810.6<br>7   | 10653.<br>65   | 7762.8<br>9   | 14072.<br>20  | 10641.<br>34   | 13441.<br>28  | 14468.<br>05   | 11016.<br>40  | 14605.<br>13  | 10578.<br>95   | 12817.<br>64  |
| chi-miR-30b-5p | TGTAAACATCCTA<br>CACTCAGCT   | 19374.<br>29  | 14295.<br>20  | 14427.<br>30  | 13312.<br>17  | 14965.<br>75  | 19186.<br>47   | 7321.0<br>4   | 11105.<br>24  | 17476.<br>32   | 12181.<br>99  | 19552.<br>38   | 18930.<br>96  | 19215.<br>80  | 9939.8<br>5    | 16795.<br>87  |
| chi-miR-30c-5p | TGTAAACATCCTA<br>CACTCTCAGCT | 112280<br>.76 | 110130<br>.08 | 88273.<br>05  | 74750.<br>73  | 84263.<br>23  | 115693<br>.35  | 98426.<br>09  | 99048.<br>38  | 147437<br>.44  | 111663<br>.05 | 132038<br>.19  | 139418<br>.72 | 128165<br>.07 | 88494.<br>73   | 136830<br>.90 |
| chi-miR-30f-5p | TGTAAACACCCTA<br>CACTCTCAGCT | 17991.<br>30  | 19253.<br>00  | 14830.<br>95  | 17673.<br>80  | 12309.<br>91  | 26754.<br>16   | 27423.<br>58  | 18099.<br>59  | 21949.<br>83   | 23521.<br>49  | 26039.<br>67   | 27240.<br>92  | 26595.<br>31  | 29144.<br>06   | 39820.<br>30  |
| chi-miR-30a-5p | TGTAAACATCCTC<br>GACTGGAAGCT | 23002.<br>32  | 17309.<br>70  | 14127.<br>74  | 13110.<br>95  | 16340.<br>47  | 32243.<br>43   | 91366.<br>83  | 23928.<br>98  | 20376.<br>10   | 19140.<br>44  | 21426.<br>72   | 23769.<br>63  | 20341.<br>73  | 14469.<br>68   | 18929.<br>16  |
| chi-miR-30e-5p | TGTAAACATCCTT<br>GACTGGAAGCT | 14812.<br>38  | 9288.6<br>4   | 7471.0<br>0   | 5836.4<br>7   | 11345.<br>52  | 19004.<br>97   | 40769.<br>52  | 18016.<br>49  | 13041.<br>65   | 12156.<br>78  | 12047.<br>57   | 10962.<br>61  | 9515.9<br>5   | 7526.7<br>8    | 10695.<br>47  |
| chi-miR-92b    | TATTGCACTTGTCC<br>CGGCCTGT   | 66963.<br>48  | 64004.<br>44  | 73273.<br>27  | 81684.<br>55  | 83213.<br>67  | 60723.<br>50   | 92643.<br>19  | 78797.<br>46  | 65935.<br>38   | 84666.<br>29  | 80895.<br>82   | 67022.<br>26  | 88932.<br>19  | 115874<br>.02  | 86577.<br>84  |

|                 |                             |                |               |                |                |                |                |                |                |                |                |                |                |                |               |               |
|-----------------|-----------------------------|----------------|---------------|----------------|----------------|----------------|----------------|----------------|----------------|----------------|----------------|----------------|----------------|----------------|---------------|---------------|
| chi-miR-92b     | TATTGCACTTGTCC<br>CGGCCTGT  | 66963.<br>48   | 64004.<br>44  | 73273.<br>27   | 81684.<br>55   | 83213.<br>67   | 60723.<br>50   | 92643.<br>19   | 78797.<br>46   | 65935.<br>38   | 84666.<br>29   | 80895.<br>82   | 67022.<br>26   | 88932.<br>19   | 115874<br>.02 | 86577.<br>84  |
| chi-miR-93-5p   | CAAAGTGCTGTTC<br>GTGCAGGTAG | 25222.<br>55   | 24945.<br>29  | 28047.<br>30   | 20722.<br>68   | 26230.<br>98   | 27005.<br>69   | 17167.<br>99   | 31709.<br>26   | 34650.<br>26   | 27812.<br>06   | 38161.<br>16   | 33031.<br>27   | 25425.<br>28   | 22381.<br>76  | 22610.<br>08  |
| chi-miR-99a-5p  | AACCCGTAGATCC<br>GATCTTGT   | 167177<br>.69  | 157458<br>.61 | 143857<br>.86  | 162109<br>.08  | 121271<br>.04  | 147777<br>.19  | 539839<br>.18  | 131113<br>.75  | 158757<br>.69  | 127848<br>.85  | 152753<br>.89  | 228667<br>.24  | 178494<br>.90  | 118130<br>.17 | 128140<br>.14 |
| chi-miR-99b-5p  | CACCCGTAGAACC<br>GACCTTGCG  | 115796<br>.13  | 151188<br>.12 | 119575<br>.36  | 107430<br>.33  | 84552.<br>90   | 85275.<br>86   | 563668<br>.01  | 93788.<br>32   | 91129.<br>15   | 129596<br>.13  | 89483.<br>79   | 139628<br>.22  | 127225<br>.87  | 142445<br>.46 | 141938<br>.13 |
| chi-miR-100-5p  | AACCCGTAGATCC<br>GATCTTGT   | 167177<br>.69  | 157458<br>.61 | 143857<br>.86  | 162109<br>.08  | 121271<br>.04  | 147777<br>.19  | 539839<br>.18  | 131113<br>.75  | 158757<br>.69  | 127848<br>.85  | 152753<br>.89  | 228667<br>.24  | 178494<br>.90  | 118130<br>.17 | 128140<br>.14 |
| chi-miR-103-3p  | AGCAGCATTGTAC<br>AGGGCTATGA | 54320.<br>17   | 57872.<br>46  | 56674.<br>46   | 47463.<br>22   | 68170.<br>29   | 61571.<br>45   | 80161.<br>79   | 76525.<br>80   | 67447.<br>34   | 57381.<br>78   | 68465.<br>74   | 62166.<br>61   | 55252.<br>00   | 42961.<br>93  | 39428.<br>59  |
| chi-miR-106b-3p | CCGCACTGTGGGT<br>ACTTGCTGC  | 4595.5<br>0    | 6311.5<br>0   | 5110.1<br>6    | 5189.7<br>4    | 5193.6<br>7    | 3475.6<br>3    | 10996.<br>25   | 4867.4<br>7    | 4364.0<br>8    | 5277.4<br>3    | 4087.5<br>7    | 4257.8<br>4    | 5286.2<br>2    | 5549.4<br>1   | 5595.0<br>6   |
| chi-miR-125b-5p | TCCCTGAGACCCT<br>AACTTGTA   | 325308<br>.05  | 366963<br>.89 | 357392<br>.61  | 410646<br>.95  | 214696<br>.39  | 306550<br>.07  | 811122<br>.60  | 315553<br>.84  | 354191<br>.78  | 503747<br>.73  | 372845<br>.10  | 489928<br>.83  | 482108<br>.30  | 482556<br>.10 | 573169<br>.90 |
| chi-miR-125a-5p | TCCCTGAGACCCT<br>TTAACCTGT  | 76423.<br>23   | 73473.<br>52  | 69836.<br>71   | 83714.<br>88   | 44604.<br>91   | 77510.<br>95   | 172388<br>.68  | 69580.<br>32   | 81558.<br>53   | 127075<br>.58  | 86828.<br>24   | 102271<br>.16  | 113921<br>.17  | 135995<br>.69 | 121615<br>.98 |
| chi-miR-126-3p  | TCGTACCGTGAGT<br>AATAATGCG  | 22155.<br>78   | 20079.<br>99  | 16552.<br>50   | 20647.<br>86   | 22652.<br>90   | 27067.<br>62   | 18944.<br>30   | 24143.<br>32   | 23704.<br>17   | 17441.<br>13   | 23834.<br>32   | 22610.<br>33   | 18744.<br>79   | 14363.<br>60  | 20422.<br>97  |
| chi-miR-127-3p  | TCGGATCCGTCTG<br>AGCTTGGCT  | 159180<br>.53  | 198602<br>.76 | 190836<br>.53  | 179957<br>.46  | 160685<br>.38  | 119067<br>.03  | 490227<br>.71  | 130713<br>.27  | 127489<br>.04  | 127811<br>.27  | 107991<br>.23  | 172715<br>.17  | 160027<br>.84  | 175085<br>.30 | 122465<br>.19 |
| chi-miR-133a-3p | TTGGTCCCCTTCA<br>ACCAGCTGT  | 63330.<br>29   | 46415.<br>43  | 57773.<br>53   | 52680.<br>17   | 23719.<br>76   | 74072.<br>95   | 35867.<br>11   | 47496.<br>95   | 69303.<br>46   | 66436.<br>07   | 58866.<br>47   | 83550.<br>64   | 51673.<br>43   | 76644.<br>15  | 66789.<br>64  |
| chi-miR-140-3p  | ACCACAGGGTAGA<br>ACCACGGAC  | 31624.<br>83   | 30640.<br>77  | 28587.<br>41   | 29835.<br>90   | 28506.<br>65   | 28652.<br>04   | 119940<br>.99  | 35911.<br>89   | 26175.<br>07   | 39225.<br>23   | 32540.<br>24   | 44156.<br>20   | 41441.<br>58   | 35936.<br>18  | 30350.<br>38  |
| chi-miR-143-5p  | GGTGCAGTGCTGC<br>ATCTCTGG   | 7447.2<br>8    | 7232.8<br>0   | 7442.7<br>3    | 7400.3<br>1    | 5505.0<br>8    | 9562.7<br>5    | 14938.<br>35   | 8685.7<br>9    | 6923.2<br>3    | 9599.6<br>4    | 7505.6<br>4    | 8307.1<br>3    | 5753.4<br>8    | 5523.9<br>9   | 6399.8<br>5   |
| chi-miR-143-3p  | TGAGATGAAGCAC<br>TGTAGCTC   | 126544<br>2.91 | 978624<br>.76 | 118518<br>9.08 | 122397<br>0.31 | 100438<br>2.33 | 174863<br>7.71 | 331278<br>5.67 | 148840<br>2.37 | 118380<br>7.11 | 137814<br>9.54 | 143433<br>8.82 | 182169<br>3.24 | 123469<br>5.89 | 681185<br>.63 | 823166<br>.51 |
| chi-miR-145-5p  | GTCCAGTTTTCCC<br>AGGAATCCCT | 413928<br>.08  | 273737<br>.54 | 305373<br>.85  | 259564<br>.08  | 158024<br>.67  | 793964<br>.42  | 638968<br>.89  | 541464<br>.83  | 631723<br>.29  | 709422<br>.09  | 752564<br>.55  | 708834<br>.75  | 619420<br>.59  | 683159<br>.93 | 806093<br>.40 |
| chi-miR-148b-3p | TCAGTGCATCACA<br>GAACTTTGT  | 11716.<br>15   | 16633.<br>54  | 15764.<br>87   | 14707.<br>66   | 18941.<br>74   | 12204.<br>72   | 29471.<br>89   | 13071.<br>93   | 15800.<br>23   | 11653.<br>46   | 18318.<br>89   | 13771.<br>45   | 16121.<br>38   | 10127.<br>90  | 9856.5<br>1   |

|                 |                              |               |               |               |               |               |               |               |               |               |               |               |               |               |               |               |
|-----------------|------------------------------|---------------|---------------|---------------|---------------|---------------|---------------|---------------|---------------|---------------|---------------|---------------|---------------|---------------|---------------|---------------|
| chi-miR-148a-3p | TCAGTGC ACTACA<br>GAACTTTGT  | 17993.<br>37  | 13478.<br>70  | 12347.<br>17  | 9831.9<br>4   | 19812.<br>08  | 20308.<br>81  | 63178.<br>32  | 25952.<br>08  | 16426.<br>19  | 14153.<br>24  | 14891.<br>68  | 16023.<br>04  | 14462.<br>52  | 7909.0<br>1   | 11173.<br>04  |
| chi-miR-150     | TCTCCCAACCCCTT<br>GTACCAGTG  | 7238.4<br>9   | 7862.5<br>0   | 10018.<br>71  | 5326.9<br>1   | 3185.0<br>5   | 7577.2<br>2   | 4807.9<br>1   | 8794.0<br>9   | 8113.9<br>7   | 11637.<br>64  | 8922.7<br>1   | 9453.6<br>8   | 18551.<br>50  | 17071.<br>68  | 17578.<br>87  |
| chi-miR-151-5p  | TCGAGGAGCTCAC<br>AGTCTAGT    | 39841.<br>64  | 59860.<br>41  | 50657.<br>82  | 56378.<br>05  | 60594.<br>93  | 37213.<br>45  | 112601<br>.43 | 42147.<br>40  | 45274.<br>54  | 42107.<br>69  | 51792.<br>35  | 57195.<br>83  | 47958.<br>81  | 36867.<br>21  | 40825.<br>43  |
| chi-miR-151-3p  | CTAGACTGAAGCT<br>CCTTGAGG    | 12902.<br>76  | 17417.<br>23  | 12956.<br>13  | 14128.<br>38  | 16357.<br>32  | 10902.<br>31  | 32350.<br>25  | 13511.<br>90  | 12716.<br>90  | 13176.<br>27  | 12666.<br>40  | 16005.<br>58  | 13610.<br>57  | 9682.1<br>0   | 13138.<br>88  |
| chi-miR-181b-5p | AACATTCATTGCT<br>GTCGGTGGGTT | 19062.<br>65  | 19039.<br>31  | 21285.<br>24  | 15153.<br>75  | 14940.<br>91  | 23146.<br>58  | 25074.<br>54  | 22894.<br>49  | 24424.<br>85  | 21651.<br>10  | 26571.<br>69  | 32499.<br>99  | 22415.<br>31  | 21861.<br>88  | 17587.<br>42  |
| chi-miR-186-5p  | CAAAGAATTCTCC<br>TTTTGGGCTT  | 23493.<br>29  | 20199.<br>36  | 17199.<br>16  | 16012.<br>47  | 21252.<br>01  | 30013.<br>52  | 38970.<br>22  | 26861.<br>34  | 29226.<br>04  | 23320.<br>76  | 26362.<br>78  | 22464.<br>06  | 24708.<br>44  | 16435.<br>20  | 21047.<br>49  |
| chi-miR-191-5p  | CAACGGAATCCCA<br>AAAGCAGCTG  | 91284.<br>71  | 82650.<br>08  | 87009.<br>65  | 94805.<br>14  | 102237<br>.48 | 99899.<br>62  | 322962<br>.36 | 134048<br>.00 | 98190.<br>04  | 136355<br>.82 | 129039<br>.59 | 101344<br>.48 | 138137<br>.96 | 109419<br>.87 | 103426<br>.25 |
| chi-miR-192-5p  | CTGACCTATGAAT<br>TGACAGCC    | 88187.<br>97  | 103572<br>.54 | 73356.<br>46  | 81439.<br>12  | 199865<br>.94 | 56505.<br>68  | 219895<br>.65 | 64759.<br>11  | 82610.<br>43  | 56386.<br>51  | 65916.<br>93  | 58206.<br>50  | 58216.<br>93  | 30809.<br>32  | 48731.<br>06  |
| chi-miR-193b-3p | AACTGGCCACAA<br>AGTCCCCT     | 17306.<br>01  | 10998.<br>20  | 12463.<br>55  | 16264.<br>13  | 7850.8<br>4   | 14316.<br>02  | 14785.<br>11  | 16803.<br>76  | 13027.<br>53  | 14312.<br>44  | 13013.<br>60  | 10673.<br>85  | 16444.<br>15  | 27350.<br>80  | 18504.<br>98  |
| chi-miR-194     | TGTAACAGCAACT<br>CCATGTGGA   | 130256<br>.56 | 105981<br>.50 | 95792.<br>41  | 116805<br>.42 | 194800<br>.92 | 89265.<br>02  | 67951.<br>75  | 86648.<br>06  | 115745<br>.20 | 86480.<br>81  | 104781<br>.64 | 78949.<br>30  | 89398.<br>51  | 55807.<br>98  | 91344.<br>19  |
| chi-miR-196b    | TAGGTAGTTTCCT<br>GTTGTTGGG   | 10525.<br>42  | 12794.<br>33  | 8681.9<br>5   | 12941.<br>47  | 18458.<br>21  | 7630.5<br>7   | 5245.9<br>2   | 5897.0<br>7   | 12588.<br>65  | 9848.8<br>3   | 16154.<br>25  | 9389.5<br>1   | 10613.<br>73  | 5947.4<br>3   | 8258.8<br>9   |
| chi-miR-197-3p  | TTCACCACCTTCTC<br>CACCCAGC   | 13850.<br>59  | 15759.<br>62  | 17677.<br>80  | 17327.<br>47  | 15088.<br>62  | 11520.<br>65  | 21781.<br>80  | 13946.<br>60  | 14717.<br>15  | 18705.<br>85  | 14222.<br>18  | 15416.<br>73  | 15342.<br>62  | 28061.<br>80  | 21572.<br>91  |
| chi-miR-199c-5p | CCCAGTGTTTCAGA<br>CTACCTGTTC | 45779.<br>83  | 38312.<br>81  | 29670.<br>09  | 33933.<br>39  | 40887.<br>54  | 41187.<br>37  | 174491<br>.90 | 42558.<br>79  | 36835.<br>24  | 31436.<br>15  | 34419.<br>56  | 37742.<br>07  | 44641.<br>08  | 22696.<br>49  | 27605.<br>82  |
| chi-miR-199a-3p | ACAGTAGTCTGCA<br>CATTGGTT    | 30784.<br>49  | 33963.<br>74  | 25116.<br>43  | 28068.<br>01  | 33597.<br>85  | 26143.<br>45  | 28798.<br>91  | 23614.<br>23  | 24792.<br>54  | 19997.<br>77  | 23068.<br>89  | 27623.<br>10  | 26479.<br>90  | 17244.<br>38  | 23479.<br>37  |
| chi-miR-199a-5p | CCCAGTGTTTCAGA<br>CTACCTGTTC | 45779.<br>83  | 38312.<br>81  | 29670.<br>09  | 33933.<br>39  | 40887.<br>54  | 41187.<br>37  | 174491<br>.90 | 42558.<br>79  | 36835.<br>24  | 31436.<br>15  | 34419.<br>56  | 37742.<br>07  | 44641.<br>08  | 22696.<br>49  | 27605.<br>82  |
| chi-miR-199a-3p | ACAGTAGTCTGCA<br>CATTGGTT    | 30784.<br>49  | 33963.<br>74  | 25116.<br>43  | 28068.<br>01  | 33597.<br>85  | 26143.<br>45  | 28798.<br>91  | 23614.<br>23  | 24792.<br>54  | 19997.<br>77  | 23068.<br>89  | 27623.<br>10  | 26479.<br>90  | 17244.<br>38  | 23479.<br>37  |
| chi-miR-200b    | TAATACTGCCTGG<br>TAATGATGAC  | 250913<br>.83 | 231979<br>.19 | 188729<br>.36 | 185024<br>.20 | 398711<br>.61 | 180883<br>.34 | 373249<br>.36 | 242647<br>.06 | 311846<br>.43 | 225913<br>.40 | 305546<br>.82 | 216668<br>.48 | 270118<br>.99 | 169230<br>.80 | 192533<br>.36 |

|                    |               |        |        |        |        |        |        |        |        |        |        |        |        |        |        |        |
|--------------------|---------------|--------|--------|--------|--------|--------|--------|--------|--------|--------|--------|--------|--------|--------|--------|--------|
| chi-miR-200a       | TAACACTGTCTGG | 50695. | 37807. | 33054. | 28554. | 77658. | 40612. | 28076. | 43769. | 50536. | 34507. | 49615. | 34638. | 32443. | 23711. | 30001. |
|                    | TAACGATGTT    | 24     | 96     | 19     | 91     | 46     | 38     | 13     | 64     | 97     | 48     | 25     | 34     | 55     | 69     | 39     |
| chi-miR-200c       | TAATACTGCCGGG | 142744 | 132646 | 106194 | 100223 | 177858 | 111039 | 113744 | 126130 | 133042 | 145257 | 127252 | 102610 | 139025 | 129327 | 134852 |
|                    | TAATGATGGA    | .83    | .37    | .69    | .31    | .04    | .17    | .99    | .08    | .68    | .84    | .06    | .88    | .57    | .63    | .68    |
| chi-miR-214-3p     | ACAGCAGGCACAG | 29364. | 34544. | 38456. | 43015. | 23157. | 24843. | 13465. | 17963. | 25620. | 30410. | 30744. | 32777. | 36853. | 50807. | 41848. |
|                    | ACAGGCAGT     | 29     | 68     | 13     | 44     | 72     | 90     | 97     | 47     | 88     | 73     | 40     | 43     | 43     | 38     | 93     |
| chi-miR-215-5p     | ATGACCTATGAAT | 2464.1 | 1118.5 | 1260.1 | 1635.2 | 4034.9 | 1610.1 | 19151. | 3194.4 | 2159.1 | 1939.1 | 2397.2 | 2237.4 | 1554.7 | 1038.8 | 1200.7 |
|                    | TGACAGACA     | 7      | 9      | 2      | 6      | 9      | 5      | 18     | 7      | 0      | 1      | 2      | 4      | 2      | 7      | 7      |
| chi-miR-221-3p     | AGCTACATTGTCT | 16843. | 14266. | 12956. | 11271. | 15225. | 15008. | 11370. | 18014. | 16745. | 12938. | 20840. | 14848. | 16023. | 15299. | 12810. |
|                    | GCTGGGTTTC    | 98     | 04     | 13     | 64     | 25     | 67     | 41     | 61     | 64     | 95     | 70     | 64     | 80     | 02     | 81     |
| chi-miR-222-3p     | AGCTACATCTGGC | 15056. | 10456. | 9171.2 | 7226.8 | 9756.5 | 14923. | 22731. | 20286. | 13787. | 16338. | 17420. | 11729. | 15184. | 19621. | 17206. |
|                    | TACTGGGTCTCT  | 84     | 90     | 5      | 7      | 5      | 87     | 89     | 65     | 62     | 57     | 14     | 82     | 99     | 08     | 38     |
| chi-miR-224-5p     | CAAGTCACTAGTG | 9299.5 | 10005. | 9085.1 | 8088.4 | 10942. | 7452.4 | 21543. | 9239.3 | 9649.4 | 7582.4 | 9872.1 | 11455. | 8354.3 | 7009.9 | 6885.1 |
|                    | GTTCCGTTT     | 4      | 82     | 9      | 2      | 74     | 1      | 00     | 2      | 5      | 1      | 3      | 21     | 7      | 7      | 2      |
| chi-miR-320-3p     | AAAAGCTGGGTTG | 49012. | 53214. | 56629. | 59097. | 56655. | 51449. | 58260. | 64067. | 56247. | 70089. | 83169. | 84691. | 69709. | 109690 | 65181. |
|                    | AGAGGGCGA     | 49     | 01     | 79     | 06     | 76     | 44     | 59     | 57     | 10     | 83     | 28     | 54     | 82     | .77    | 78     |
| chi-miR-342-3p     | TCTCACACAGAAA | 57838. | 49887. | 45589. | 44033. | 40630. | 73595. | 41295. | 56338. | 73986. | 61717. | 70126. | 60650. | 79353. | 63958. | 75358. |
|                    | TCGCACCCATC   | 63     | 85     | 87     | 43     | 25     | 15     | 64     | 42     | 99     | 34     | 60     | 60     | 38     | 52     | 66     |
| chi-miR-361-5p     | TTATCAGAATCTC | 12656. | 9718.7 | 11030. | 11624. | 10516. | 12854. | 16515. | 12337. | 13042. | 11626. | 13201. | 9756.6 | 14807. | 11435. | 11194. |
|                    | CAGGGGTAC     | 75     | 7      | 08     | 20     | 88     | 50     | 45     | 14     | 82     | 76     | 33     | 0      | 80     | 47     | 40     |
| chi-miR-365-3p     | TAATGCCCTAAA  | 12878. | 8581.4 | 8618.0 | 10524. | 5145.7 | 15033. | 6987.7 | 12211. | 13105. | 11095. | 12110. | 8383.5 | 15200. | 16126. | 15834. |
|                    | AATCCTTAT     | 98     | 9      | 2      | 58     | 6      | 44     | 5      | 55     | 18     | 75     | 70     | 6      | 00     | 61     | 31     |
| chi-miR-378-3p     | ACTGGACTTGAG  | 117211 | 165700 | 128123 | 129840 | 161087 | 116524 | 399160 | 134281 | 132729 | 142785 | 177164 | 151023 | 126942 | 134739 | 150798 |
|                    | TCAGAAGGC     | .16    | .20    | .72    | .99    | .28    | .14    | .97    | .89    | .70    | .25    | .26    | .97    | .51    | .40    | .48    |
| chi-miR-380-3p     | TATGTAATGTGGT | 11687. | 9819.9 | 12592. | 14123. | 9256.1 | 8922.5 | 6402.8 | 6379.9 | 8004.5 | 7093.9 | 7232.3 | 7372.8 | 11338. | 8198.7 | 7904.3 |
|                    | CCACGTCT      | 21     | 2      | 23     | 85     | 7      | 0      | 8      | 1      | 4      | 2      | 6      | 9      | 07     | 5      | 4      |
| chi-miR-409-5p     | AGGTTACCCGAGC | 4650.2 | 4406.0 | 3750.4 | 2998.4 | 3530.1 | 3809.0 | 18641. | 5020.9 | 3599.2 | 3712.1 | 2649.7 | 3177.3 | 3644.2 | 3494.4 | 2604.8 |
|                    | AACTTTGCAT    | 8      | 2      | 6      | 4      | 7      | 9      | 65     | 0      | 8      | 0      | 3      | 4      | 5      | 6      | 8      |
| chi-miR-409-3p_R+1 | GAATGTTGCTCGG | 16353. | 17111. | 18988. | 16487. | 14681. | 12701. | 32168. | 20048. | 13080. | 13335. | 10898. | 12287. | 12482. | 15791. | 12090. |
|                    | TGAACCCCT     | 00     | 05     | 33     | 46     | 40     | 11     | 92     | 99     | 48     | 47     | 80     | 52     | 76     | 72     | 60     |
| chi-miR-423-5p     | TGAGGGGCAGAGA | 25229. | 26387. | 27903. | 23292. | 25257. | 27293. | 59727. | 42902. | 30520. | 45913. | 39892. | 36880. | 40463. | 43376. | 33302. |
|                    | GCGAGACTTT    | 79     | 84     | 87     | 61     | 72     | 42     | 87     | 49     | 32     | 73     | 21     | 50     | 90     | 60     | 98     |

|                    |                             |              |              |              |              |              |              |              |              |              |              |              |              |              |              |              |
|--------------------|-----------------------------|--------------|--------------|--------------|--------------|--------------|--------------|--------------|--------------|--------------|--------------|--------------|--------------|--------------|--------------|--------------|
| chi-miR-423-3p     | AGCTCGGTCTGAG<br>GCCCCTCAGT | 45392.<br>74 | 61522.<br>12 | 47283.<br>15 | 41076.<br>94 | 44643.<br>06 | 42981.<br>40 | 93362.<br>78 | 68795.<br>15 | 52951.<br>39 | 80568.<br>55 | 60626.<br>60 | 59735.<br>24 | 60208.<br>88 | 84922.<br>68 | 73601.<br>28 |
| chi-miR-455-3p_R-1 | GCAGTCCATGGGC<br>ATATACAC   | 10201.<br>89 | 14532.<br>13 | 14596.<br>95 | 17046.<br>33 | 10243.<br>62 | 14674.<br>25 | 9845.6<br>7  | 13137.<br>36 | 12152.<br>12 | 15240.<br>96 | 17659.<br>36 | 14293.<br>77 | 12987.<br>55 | 19230.<br>95 | 16381.<br>95 |
| chi-miR-490        | CAACCTGGAGGAC<br>TCCATGCTGT | 7649.8<br>7  | 4271.1<br>5  | 4968.3<br>7  | 2670.8<br>2  | 1683.9<br>1  | 4637.9<br>9  | 17129.<br>68 | 5105.1<br>3  | 4242.8<br>9  | 5685.8<br>2  | 3089.1<br>4  | 5528.0<br>2  | 3115.0<br>6  | 4993.6<br>0  | 3983.7<br>8  |
| chi-miR-500-3p     | ATGCACCTGGGCA<br>AGGATTCTGA | 2681.2<br>3  | 3180.8<br>1  | 3125.9<br>3  | 2657.2<br>2  | 3243.1<br>6  | 2369.4<br>9  | 14198.<br>33 | 3253.8<br>8  | 3192.1<br>7  | 3338.8<br>1  | 3150.6<br>1  | 3314.6<br>4  | 2905.8<br>3  | 2749.2<br>8  | 2346.0<br>1  |
| chi-miR-532-5p     | CATGCCTTGAGTG<br>TAGGACCGT  | 5591.9<br>2  | 5445.7<br>9  | 6647.7<br>2  | 7069.2<br>9  | 8028.2<br>8  | 5440.2<br>0  | 12748.<br>30 | 7238.7<br>8  | 5364.2<br>1  | 5678.9<br>0  | 6710.7<br>2  | 6678.3<br>5  | 4513.0<br>9  | 4388.6<br>8  | 4420.3<br>5  |
| chi-miR-3431-5p    | CCTCAGTCAGCCT<br>TGTGGATGT  | 12515.<br>15 | 12208.<br>38 | 12572.<br>56 | 10588.<br>07 | 17275.<br>57 | 9865.7<br>2  | 15921.<br>64 | 12849.<br>31 | 11335.<br>55 | 11145.<br>19 | 13085.<br>04 | 14699.<br>54 | 11338.<br>07 | 11818.<br>58 | 9932.5<br>4  |



**Table S4:** The dynamic miRNAs in goat colon from D10 to D31

| miRNA                                      | D10 | D25       | D31       | <i>P</i> -values |
|--------------------------------------------|-----|-----------|-----------|------------------|
| Gene Table for Profile 0 (0.0, -1.0, -2.0) |     |           |           | 0.024            |
| 1 CHI-MIR-1197-3P                          | 0   | -19.41    | -36.53    |                  |
| 2 CHI-MIR-758_R-1                          | 0   | -273.70   | -465.43   |                  |
| 3 CHI-MIR-411A-3P                          | 0   | -543.55   | -912.93   |                  |
| 4 CHI-MIR-493-3P                           | 0   | -179.44   | -255.48   |                  |
| 5 CHI-MIR-382-3P_R+1                       | 0   | -39.17    | -139.70   |                  |
| 6 CHI-MIR-412-5P                           | 0   | -109.14   | -269.07   |                  |
| 7 CHI-MIR-130B-5P                          | 0   | -628.74   | -1169.07  |                  |
| 8 CHI-MIR-665_R+2                          | 0   | -202.00   | -388.48   |                  |
| 9 CHI-MIR-3959-3P                          | 0   | -28.94    | -62.77    |                  |
| 10 CHI-MIR-379-5P                          | 0   | -397.83   | -1442.10  |                  |
| 11 CHI-MIR-381_1SS4AG                      | 0   | -59.05    | -204.99   |                  |
| 12 CHI-MIR-301A-5P_R+1                     | 0   | -8.89     | -14.47    |                  |
| Gene Table for Profile 1 (0.0, -1.0, -1.0) |     |           |           | 0.023            |
| 1 CHI-MIR-493-5P                           | 0   | -2929.6   | -2,829.03 |                  |
| 2 CHI-MIR-124A_R-1                         | 0   | -493.19   | -289.55   |                  |
| 3 CHI-MIR-410-3P                           | 0   | -865.49   | -1,140.76 |                  |
| 4 CHI-MIR-323B                             | 0   | -593.06   | -792.81   |                  |
| 5 CHI-MIR-411B-3P_1SS6CA                   | 0   | -29.82    | -21.65    |                  |
| 6 CHI-MIR-1271-3P                          | 0   | -18.92    | -14.78    |                  |
| 7 CHI-MIR-134_R-1                          | 0   | -45.65    | -60.83    |                  |
| 8 CHI-MIR-592                              | 0   | -18.00    | -15.46    |                  |
| 9 CHI-MIR-380-3P                           | 0   | -4,135.12 | -3,086.59 |                  |
| 10 CHI-MIR-382-5P                          | 0   | -705.72   | -663.6    |                  |
| 11 CHI-MIR-1306-3P_1SS22GT                 | 0   | -100.07   | -71.03    |                  |
| 12 CHI-MIR-379-3P                          | 0   | -613      | -638.01   |                  |
| 13 CHI-MIR-412-3P_L-1                      | 0   | -20.49    | -21.53    |                  |
| 14 CHI-MIR-128-3P                          | 0   | -2,059.22 | -2,097.99 |                  |
| 15 CHI-MIR-496-5P                          | 0   | -7.67     | -5.96     |                  |
| 16 CHI-MIR-1307-5P_R+5                     | 0   | -201.20   | -115.13   |                  |
| 17 CHI-MIR-496-3P_R+1                      | 0   | -35.19    | -46.13    |                  |
| 18 CHI-MIR-107-3P                          | 0   | -1,473.39 | -1,902.38 |                  |

|                                          |                             |   |            |            |       |
|------------------------------------------|-----------------------------|---|------------|------------|-------|
| 19                                       | CHI-MIR-199A-3P             | 0 | -5,636.73  | -6,726.98  |       |
| 20                                       | CHI-MIR-432-5P_1SS23GT      | 0 | -1,046.70  | -808.66    |       |
| 21                                       | CHI-MIR-194                 | 0 | -39,509.19 | -44,671.03 |       |
| 22                                       | CHI-MIR-34C-5P              | 0 | -61.30     | -73.78     |       |
| 23                                       | PC-3P-37101_116             | 0 | -19.28     | -21.60     |       |
| 24                                       | PC-3P-3191_2100             | 0 | -74.51     | -63.31     |       |
| Gene Table for Profile 2 (0.0, -1.0,0.0) |                             |   |            |            | 0.982 |
| 1                                        | CHI-MIR-211                 | 0 | -57.63     | 18.19      |       |
| 2                                        | CHI-MIR-214-3P_L-1R+3       | 0 | -11,246.66 | 4,898.66   |       |
| 3                                        | CHI-MIR-214-5P              | 0 | -102.99    | -4.06      |       |
| 4                                        | CHI-MIR-329B-3P_R+1         | 0 | -549.76    | -247.17    |       |
| 5                                        | CHI-MIR-329A-3P_R+1_1SS19TC | 0 | -549.76    | -247.17    |       |
| Gene Table for Profile 3 (0.0,0.0, -1.0) |                             |   |            |            | 0.805 |
| 1                                        | CHI-MIR-98-5P               | 0 | 112.63     | -284.83    |       |
| 2                                        | CHI-MIR-22-3P_R+3           | 0 | 2,895.81   | -3,977.78  |       |
| 3                                        | CHI-MIR-494                 | 0 | 1,290.21   | -1,402.23  |       |
| 4                                        | CHI-MIR-340-5P              | 0 | 56.26      | -95.29     |       |
| 5                                        | CHI-MIR-3959-5P             | 0 | 6.41       | -202.94    |       |
| Gene Table for Profile 4 (0.0,0.0,1.0)   |                             |   |            |            | 0.999 |
| 1                                        | CHI-MIR-320-3P              | 0 | 5,101.08   | 27,566.81  |       |
| 2                                        | CHI-MIR-129-3P              | 0 | -411.06    | 1,765.55   |       |
| 3                                        | CHI-MIR-150                 | 0 | 1,459.83   | 7,589.36   |       |
| 4                                        | CHI-MIR-99A-3P              | 0 | -53.36     | 110.12     |       |
| 5                                        | PC-3P-89392_15              | 0 | 0          | 3.92       |       |
| 6                                        | PC-5P-27762_176             | 0 | -1.03      | 6.01       |       |
| Gene Table for Profile 5 (0.0,1.0,0.0)   |                             |   |            |            | 0.794 |
| 1                                        | CHI-MIR-186-5P_R+1          | 0 | 10,047.12  | 2,572.34   |       |
| 2                                        | CHI-MIR-146A                | 0 | 883.38     | 83.51      |       |
| 3                                        | CHI-MIR-146B-5P             | 0 | 1,726.04   | 63.26      |       |
| 4                                        | CHI-MIR-374B-3P             | 0 | 3.42       | -1.24      |       |
| 5                                        | CHI-MIR-145-3P_L+2R-1       | 0 | 2,032.56   | 449.18     |       |
| 6                                        | CHI-MIR-33B-3P              | 0 | 10.7       | -5.88      |       |
| 7                                        | CHI-MIR-1                   | 0 | 1,889.91   | 106.05     |       |
| 8                                        | CHI-MIR-143-5P              | 0 | 2,936.31   | -307.62    |       |

|                                        |                        |   |            |            |       |
|----------------------------------------|------------------------|---|------------|------------|-------|
| 9                                      | CHI-MIR-30C-3P_R+1     | 0 | 50.96      | 11.68      |       |
| 10                                     | CHI-MIR-146B-3P        | 0 | 122.14     | 13.16      |       |
| 11                                     | PC-5P-62000_42         | 0 | 8.21       | 0          |       |
| 12                                     | PC-5P-18419_285        | 0 | 33.04      | -9.76      |       |
| 13                                     | PC-3P-80363_21         | 0 | 4.18       | 0          |       |
| 14                                     | PC-3P-43684_88         | 0 | 6.85       | -0.12      |       |
| 15                                     | PC-5P-3628_1784        | 0 | 161.3      | 37.74      |       |
| Gene Table for Profile 6 (0.0,1.0,1.0) |                        |   |            |            | 0.503 |
| 1                                      | CHI-MIR-145-5P         | 0 | 380,983.06 | 431,889.00 |       |
| 2                                      | CHI-MIR-29B-5P         | 0 | 121.01     | 155.44     |       |
| 3                                      | CHI-MIR-222-3P_R+1     | 0 | 7,280.04   | 5,898.80   |       |
| 4                                      | CHI-MIR-423-5P         | 0 | 15,657.20  | 13,168.87  |       |
| 5                                      | CHI-MIR-181B-5P_R+1    | 0 | 5,541.94   | 6,290.89   |       |
| 6                                      | CHI-MIR-195-3P_R+1     | 0 | 288.78     | 194.9      |       |
| 7                                      | CHI-MIR-342-5P         | 0 | 88.3       | 75.06      |       |
| Gene Table for Profile 7 (0.0,1.0,2.0) |                        |   |            |            | 0.024 |
| 1                                      | CHI-MIR-29C-5P_1SS23AT | 0 | 162.94     | 239.2      |       |
| 2                                      | CHI-MIR-30F-5P_R+1     | 0 | 7,137.94   | 13,356.26  |       |
| 3                                      | CHI-LET-7B-5P          | 0 | 42,780.02  | 65,297.70  |       |
| 4                                      | CHI-MIR-92A-5P         | 0 | 15.46      | 25.16      |       |
| 5                                      | CHI-MIR-342-3P_R+2     | 0 | 13,790.70  | 22,293.55  |       |
| 6                                      | CHI-MIR-29A-3P_R+1     | 0 | 2,738.35   | 4,121.32   |       |
| 7                                      | CHI-MIR-671-5P         | 0 | 19.24      | 35.54      |       |
| 8                                      | CHI-MIR-425-5P_L-1R+2  | 0 | 354.58     | 625.13     |       |
| 9                                      | CHI-MIR-193B-5P        | 0 | 36.21      | 80.45      |       |
| 10                                     | CHI-MIR-491-5P_R+1     | 0 | 62.6       | 175.79     |       |
| 11                                     | CHI-MIR-23A_R+1        | 0 | 16,622.14  | 27,387.08  |       |
| 12                                     | PC-3P-20760_249        | 0 | 8.06       | 17.26      |       |

---

**Table S5:** The identified DEmiRNAs in the goat colon.

| miR_<br>name    | miR_seq  | D10_1<br>(norm) | D10_2<br>(norm) | D10_3<br>(norm) | D10_4<br>(norm) | D10_5<br>(norm) | D25_1<br>(norm) | D25_2<br>(norm) | D25_3<br>(norm) | D25_4<br>(norm) | D25_5<br>(norm) | D31_1<br>(norm) | D31_2<br>(norm) | D31_3<br>(norm) | D31_4<br>(norm) | D31_5<br>(norm) |
|-----------------|----------|-----------------|-----------------|-----------------|-----------------|-----------------|-----------------|-----------------|-----------------|-----------------|-----------------|-----------------|-----------------|-----------------|-----------------|-----------------|
|                 | ATATACA  |                 |                 |                 |                 |                 |                 |                 |                 |                 |                 |                 |                 |                 |                 |                 |
| chi-miR-1185-3p | GAGGGAG  | 81.656          | 84.748          | 58.191          | 46.478          | 65.652          | 104.80          | 24.263          | 72.199          | 44.711          | 24.720          | 15.782          | 18.873          | 18.765          | 35.067          | 67.492          |
|                 | ACTCTTAT | 48211           | 74639           | 11424           | 66561           | 86255           | 24656           | 00884           | 82339           | 5274            | 95152           | 11941           | 39635           | 43041           | 38123           | 76279           |
|                 | TAGGACA  |                 |                 |                 |                 |                 |                 |                 |                 |                 |                 |                 |                 |                 |                 |                 |
| chi-miR-1197-3p | CATGGTC  | 68.219          | 63.789          | 63.108          | 68.017          | 84.284          | 51.448          | 62.573          | 47.381          | 49.418          | 39.553          | 25.749          | 31.141          | 43.160          | 25.423          | 39.299          |
|                 | TACTTCT  | 33949           | 379             | 6732            | 55943           | 0803            | 4831            | 0228            | 1341            | 00397           | 52244           | 77378           | 10398           | 48995           | 85139           | 5834            |
|                 | TAAGGCA  |                 |                 |                 |                 |                 |                 |                 |                 |                 |                 |                 |                 |                 |                 |                 |
| chi-miR-124a    | CGCGGTG  | 566.42          | 780.96          | 885.98          | 1122.2          | 868.56          | 412.54          | 291.15          | 219.60          | 392.99          | 442.01          | 528.28          | 619.99          | 437.23          | 571.59          | 619.39          |
|                 | AATGC    | 7243            | 42544           | 02042           | 89731           | 96276           | 06145           | 61061           | 77961           | 07934           | 06133           | 56814           | 10701           | 45286           | 8314            | 56079           |
|                 | AGTGCCT  |                 |                 |                 |                 |                 |                 |                 |                 |                 |                 |                 |                 |                 |                 |                 |
| chi-miR-1271-3p | GCTATGT  | 18.605          | 16.402          | 27.866          | 34.008          | 29.277          | 8.5747          | 0               | 9.0249          | 7.0597          | 6.9218          | 5.8144          | 17.929          | 0               | 12.273          | 16.232          |
|                 | GCCAGG   | 27441           | 98317           | 16738           | 77972           | 6279            | 47183           |                 | 77923           | 14852           | 66427           | 65047           | 72653           |                 | 58343           | 43662           |
|                 | GTCCAGT  |                 |                 |                 |                 |                 |                 |                 |                 |                 |                 |                 |                 |                 |                 |                 |
|                 | TTTCCCAG |                 |                 |                 |                 |                 |                 |                 |                 |                 |                 |                 |                 |                 |                 |                 |
| chi-miR-145-5p  | GAATCCC  | 413928          | 273737          | 305373          | 259564          | 158024          | 793964          | 638968          | 541464          | 631723          | 709422          | 752564          | 708834          | 619420          | 683159          | 806093          |
|                 | T        | .0777           | .5396           | .8541           | .0758           | .6658           | .4242           | .8918           | .8317           | .2875           | .0901           | .5498           | .7524           | .5864           | .9272           | .4048           |
|                 | TGAGAAC  |                 |                 |                 |                 |                 |                 |                 |                 |                 |                 |                 |                 |                 |                 |                 |
|                 | TGAATTC  |                 |                 |                 |                 |                 |                 |                 |                 |                 |                 |                 |                 |                 |                 |                 |
| chi-miR-146a    | CATAGGT  | 575.72          | 414.63          | 298.33          | 253.93          | 347.78          | 1424.3          | 1678.6          | 2107.3          | 423.58          | 673.39          | 539.08          | 334.05          | 394.07          | 307.71          | 733.02          |
|                 | T        | 98802           | 09635           | 19097           | 22219           | 27314           | 60782           | 17112           | 32345           | 28911           | 87195           | 39737           | 91154           | 40387           | 62703           | 26642           |
|                 | TCTCCCA  |                 |                 |                 |                 |                 |                 |                 |                 |                 |                 |                 |                 |                 |                 |                 |
| chi-miR-150     | ACCCTTGT | 7238.4          | 7862.4          | 10018.          | 5326.9          | 3185.0          | 7577.2          | 4807.9          | 8794.0          | 8113.9          | 11637.          | 8922.7          | 9453.6          | 18551.          | 17071.          | 17578.          |
|                 | ACCAGTG  | 8537            | 96601           | 70677           | 08529           | 51035           | 18261           | 06752           | 88905           | 65603           | 63514           | 11934           | 84232           | 50451           | 67787           | 87452           |

|                 |          |        |        |        |        |        |        |        |        |        |        |        |        |        |        |        |
|-----------------|----------|--------|--------|--------|--------|--------|--------|--------|--------|--------|--------|--------|--------|--------|--------|--------|
|                 | TGTCAGTT |        |        |        |        |        |        |        |        |        |        |        |        |        |        |        |
| chi-miR-223-3p  | TGTCAAA  | 275.97 | 1420.6 | 475.36 | 671.10 | 1208.3 | 5258.2 | 247.73 | 7662.9 | 1151.9 | 2003.3 | 2901.4 | 451.07 | 2071.7 | 2537.1 | 3501.9 |
|                 | TACCCCA  | 8237   | 80598  | 40319  | 65864  | 67551  | 25523  | 80903  | 58338  | 1014   | 85912  | 18059  | 41728  | 03518  | 25032  | 34616  |
|                 | CCTATTCT |        |        |        |        |        |        |        |        |        |        |        |        |        |        |        |
| chi-miR-26a-3p  | CGGTTAC  | 7.2353 | 6.3789 | 4.0979 | 10.202 | 4.4360 | 4.7637 | 7.6620 | 4.5124 | 8.2363 | 0      | 4.1531 | 4.7183 | 0      | 0      | 4.2716 |
|                 | TTGCACG  | 84491  | 379    | 65792  | 63391  | 04227  | 48435  | 02792  | 88962  | 33994  |        | 89319  | 49088  |        |        | 93847  |
|                 | ACTGATTT |        |        |        |        |        |        |        |        |        |        |        |        |        |        |        |
|                 | CTTTTGGT |        |        |        |        |        |        |        |        |        |        |        |        |        |        |        |
| chi-miR-29a-5p  | GTTCAGA  | 6.2017 | 6.3789 | 4.9175 |        | 11.533 | 30.487 | 0      | 26.322 | 14.119 | 0      | 47.346 | 12.267 | 9.3827 | 28.053 | 28.193 |
|                 | GT       | 58135  | 379    | 5895   | 0      | 61099  | 98999  |        | 85228  | 4297   |        | 35824  | 70763  | 15207  | 90498  | 17939  |
|                 |          |        |        |        |        |        |        |        |        |        |        |        |        |        |        |        |
|                 | CTAGCAC  |        |        |        |        |        |        |        |        |        |        |        |        |        |        |        |
|                 | CATTTGA  |        |        |        |        |        |        |        |        |        |        |        |        |        |        |        |
| chi-miR-29b-3p  | AATCAGT  | 27.907 | 15.491 | 31.964 | 5.6681 | 23.954 | 92.416 | 7.6620 | 72.199 | 18.825 | 62.296 | 45.685 | 57.563 | 35.654 | 35.944 | 69.201 |
|                 | G        | 91161  | 70633  | 13318  | 29953  | 42282  | 71964  | 02792  | 82339  | 90627  | 79784  | 08251  | 85887  | 31779  | 06576  | 44033  |
|                 | CTGGTTTC |        |        |        |        |        |        |        |        |        |        |        |        |        |        |        |
|                 | ACATGGT  |        |        |        |        |        |        |        |        |        |        |        |        |        |        |        |
| chi-miR-29b-5p  | GGCTTAG  | 185.01 | 143.98 | 154.08 | 113.36 | 123.32 | 297.25 | 201.76 | 285.79 | 223.55 | 316.42 | 299.86 | 433.14 | 283.35 | 252.48 | 228.10 |
|                 | A        | 91177  | 17412  | 35138  | 25991  | 09175  | 79024  | 60735  | 09676  | 7637   | 81795  | 02689  | 44463  | 79992  | 51448  | 84515  |
|                 | TGACCGA  |        |        |        |        |        |        |        |        |        |        |        |        |        |        |        |
| chi-miR-29c-5p  | TTTCTCCT |        |        |        |        |        |        |        |        |        |        |        |        |        |        |        |
|                 | GGTGTTC  | 231.53 | 232.38 | 188.51 | 190.45 | 147.28 | 476.37 | 257.95 | 311.36 | 382.40 | 376.75 | 430.27 | 523.74 | 365.93 | 431.33 | 434.86 |
|                 | CACAATA  |        |        |        |        |        |        |        |        |        |        |        |        |        |        |        |
| chi-miR-323b    | CACGGTC  | 1368.5 | 1368.7 | 1870.3 | 1953.2 | 1209.2 | 774.58 | 1236.1 | 1116.0 | 829.51 | 848.42 | 575.63 | 529.39 | 793.77 | 1118.6 | 788.55 |
|                 | GGCCTCT  | 21295  | 37818  | 11587  | 37582  | 54752  | 54956  | 3645   | 88936  | 64951  | 30563  | 20397  | 87676  | 77065  | 49461  | 46842  |
|                 |          |        |        |        |        |        |        |        |        |        |        |        |        |        |        |        |
|                 | CTTATCA  |        |        |        |        |        |        |        |        |        |        |        |        |        |        |        |
| chi-miR-374b-3p | GGTTGTA  | 6.2017 |        |        |        |        | 5.7164 | 0      | 6.7687 | 5.8830 | 4.9441 | 0      | 0      | 0      | 0      | 0      |
|                 | TTATCATT | 58135  | 0      | 0      | 0      | 0      | 98122  |        | 33442  | 9571   | 90305  |        |        |        |        |        |

|                |          |        |        |        |        |        |        |        |        |        |        |        |        |        |        |        |
|----------------|----------|--------|--------|--------|--------|--------|--------|--------|--------|--------|--------|--------|--------|--------|--------|--------|
|                | GTAGATT  |        |        |        |        |        |        |        |        |        |        |        |        |        |        |        |
| chi-miR-376a   | CTCCTTCT | 119.90 | 91.127 | 70.485 | 46.478 | 39.924 | 94.322 | 0      | 33.843 | 54.124 | 23.732 | 27.411 | 19.817 | 28.148 | 32.437 | 47.842 |
|                | ATGAGT   | 06573  | 68429  | 01162  | 66561  | 03804  | 21902  |        | 66721  | 48053  | 11346  | 04951  | 06617  | 14562  | 32763  | 97109  |
|                | ATGGTTG  |        |        |        |        |        |        |        |        |        |        |        |        |        |        |        |
|                | ACCACAG  |        |        |        |        |        |        |        |        |        |        |        |        |        |        |        |
| chi-miR-380-5p | AACATGC  | 7.2353 | 8.2014 | 6.5567 |        | 5.3232 | 4.7637 |        | 10.529 |        |        |        |        |        | 4.3834 |        |
|                | G        | 84491  | 91586  | 45267  | 0      | 05072  | 48435  | 0      | 14091  | 0      | 0      | 0      | 0      | 0      | 22653  | 0      |
|                | AATATAA  |        |        |        |        |        |        |        |        |        |        |        |        |        |        |        |
| chi-miR-410-3p | CACAGAT  | 2767.0 | 1924.6 | 2273.5 | 2535.9 | 1837.3 | 2004.5 | 1154.4 | 1331.9 | 1354.2 | 1165.8 | 928.65 | 870.06 | 1352.9 | 1084.4 | 1398.5 |
|                | GGCCTGT  | 17755  | 16692  | 51421  | 21341  | 92951  | 85342  | 08421  | 36325  | 88632  | 40074  | 31318  | 35718  | 87533  | 58764  | 52566  |
|                | CTTCACCT |        |        |        |        |        |        |        |        |        |        |        |        |        |        |        |
| chi-miR-412-3p | GGTCCAC  | 20.672 | 19.136 | 54.093 | 31.741 | 26.616 | 12.385 | 6.3850 | 8.2728 | 0      | 22.743 | 0      | 0      | 15.012 | 21.040 | 8.5433 |
|                | TAGCT    | 52712  | 8137   | 14845  | 52773  | 02536  | 74593  | 02327  | 9643   |        | 2754   |        |        | 34433  | 42874  | 87695  |
|                | TCACTCCT |        |        |        |        |        |        |        |        |        |        |        |        |        |        |        |
| chi-miR-483    | CTCCTCCC | 262.54 | 375.44 | 375.37 | 637.09 | 226.23 | 263.91 | 90.667 | 217.35 | 220.02 | 233.36 | 313.15 | 208.55 | 501.03 | 621.56 | 524.56 |
|                | GTCTTCT  | 10944  | 60593  | 36665  | 78067  | 62156  | 16633  | 03304  | 15516  | 77796  | 57824  | 04747  | 10297  | 69921  | 93322  | 40045  |
|                | TTGTACAT |        |        |        |        |        |        |        |        |        |        |        |        |        |        |        |
| chi-miR-493-5p | GGTAGGC  | 4999.6 | 7253.7 | 6637.8 | 4949.4 | 4818.3 | 2541.9 | 3025.2 | 3008.3 | 3475.7 | 1959.8 | 2622.3 | 3930.3 | 3009.9 | 2527.4 | 2423.7 |
|                | TTTCATT  | 50683  | 6367   | 8499   | 11075  | 87791  | 36165  | 14102  | 25974  | 32946  | 77037  | 23736  | 8479   | 75038  | 81502  | 59089  |
|                | GAGTCGG  |        |        |        |        |        |        |        |        |        |        |        |        |        |        |        |
| chi-miR-496-5p | GTACTION |        | 7.2902 | 14.752 | 5.6681 | 10.646 | 0      | 0      | 0      | 0      | 0      | 0      | 0      | 0      | 0      | 8.5433 |
|                | AATGGA   | 0      | 14743  | 67685  | 29953  | 41014  |        |        |        |        |        |        |        |        |        | 87695  |
|                | TCTTGTTA |        |        |        |        |        |        |        |        |        |        |        |        |        |        |        |
| chi-miR-544-5p | AAAGGCA  | 36.176 | 6.3789 | 18.850 | 15.870 | 26.616 | 27.629 | 26.817 | 21.058 | 20.002 | 12.854 | 7.4757 | 6.6056 | 0      | 19.287 | 16.232 |
|                | GATTCT   | 92245  | 379    | 64264  | 76387  | 02536  | 74092  | 00977  | 28182  | 52541  | 89479  | 40775  | 88723  |        | 05967  | 43662  |
|                | TTGTGTCA |        |        |        |        |        |        |        |        |        |        |        |        |        |        |        |
| chi-miR-592    | ATATGCG  | 28.941 | 19.136 | 18.850 |        | 23.067 | 0      | 0      | 0      | 0      | 0      | 0      | 5.6620 | 0      | 7.0134 | 0      |
|                | ATGATGT  | 53796  | 8137   | 64264  | 0      | 22198  |        |        |        |        |        |        | 18905  |        | 76245  |        |

|                 |          |        |        |        |        |        |        |        |        |        |        |        |        |        |        |        |
|-----------------|----------|--------|--------|--------|--------|--------|--------|--------|--------|--------|--------|--------|--------|--------|--------|--------|
| chi-miR-656     | AATATTA  |        |        |        |        |        |        |        |        |        |        |        |        |        |        |        |
|                 | TACAGTC  | 24.807 | 11.846 | 5.7371 | 12.469 | 15.082 | 18.102 | 0      | 6.7687 | 12.942 | 6.9218 | 8.3063 | 0      | 0      | 4.3834 | 6.8347 |
|                 | AACCTCT  | 03254  | 59896  | 52109  | 8859   | 41437  | 24405  |        | 33442  | 81056  | 66427  | 78639  |        |        | 22653  | 10156  |
|                 |          |        |        |        |        |        |        |        |        |        |        |        |        |        |        |        |
| chi-miR-758     | TTTGTGAC |        |        |        |        |        |        |        |        |        |        |        |        |        |        |        |
|                 | CTGGTCC  | 981.94 | 677.07 | 954.82 | 919.37 | 981.24 | 759.34 | 759.81 | 588.87 | 598.89 | 439.04 | 387.07 | 453.90 | 463.50 | 412.91 | 469.88 |
|                 | ACTAAC   | 5038   | 86943  | 60295  | 06783  | 41349  | 15006  | 52769  | 98095  | 91433  | 40991  | 72446  | 51822  | 61312  | 84139  | 63232  |
|                 |          |        |        |        |        |        |        |        |        |        |        |        |        |        |        |        |
| PC-3p-34697_129 | TCACGGC  |        |        |        |        |        |        |        |        |        |        |        |        |        |        |        |
|                 | CTCTCTGC |        | 9.1127 |        |        | 6.2104 | 11.432 | 17.878 | 12.033 | 0      | 12.854 | 18.274 | 5.6620 | 15.012 | 9.6435 | 8.5433 |
|                 | CCCCAGT  | 0      | 68429  | 0      | 0      | 05917  | 99624  | 00651  | 3039   |        | 89479  | 03301  | 18905  | 34433  | 29837  | 87695  |
| PC-3p-37101_116 | GCGTCTC  |        |        |        |        |        |        |        |        |        |        |        |        |        |        |        |
|                 | ACTGAGC  | 28.941 | 25.515 | 60.649 | 34.008 | 33.713 | 23.818 | 0      | 9.0249 | 25.885 | 27.687 | 13.290 | 7.5493 | 16.888 | 14.903 | 22.212 |
|                 | AGCATGT  | 53796  | 7516   | 89372  | 77972  | 63212  | 74218  |        | 77923  | 62112  | 46571  | 20582  | 5854   | 88737  | 63702  | 80801  |
|                 |          |        |        |        |        |        |        |        |        |        |        |        |        |        |        |        |
| PC-3p-37151_116 | TGGTGCT  |        |        |        |        |        |        |        |        |        |        |        |        |        |        |        |
|                 | CCCTGGA  |        |        |        |        |        |        |        |        |        |        |        |        |        |        |        |
|                 | GCTGAGC  | 9.3026 | 15.491 | 9.8351 | 10.202 | 19.518 | 9.5274 | 6.3850 | 12.033 | 0      | 10.877 | 12.459 | 4.7183 | 0      | 0      | 6.8347 |
|                 |          |        |        |        |        |        |        |        |        |        |        |        |        |        |        |        |
| PC-3p-37745_113 | A        | 37203  | 70633  | 17901  | 63391  | 4186   | 9687   | 02327  | 3039   |        | 21867  | 56796  | 49088  |        |        | 10156  |
|                 |          |        |        |        |        |        |        |        |        |        |        |        |        |        |        |        |
|                 |          |        |        |        |        |        |        |        |        |        |        |        |        |        |        |        |
|                 |          |        |        |        |        |        |        |        |        |        |        |        |        |        |        |        |
| PC-3p-37745_113 | TGTACTCT |        |        |        |        |        | 18.578 | 84.920 | 26.698 | 5.8830 | 28.181 | 6.2297 | 6.6056 | 13.135 | 4.3834 | 0      |
|                 | GGGACTC  |        |        |        |        |        | 6189   | 53094  | 89302  | 9571   | 88474  | 83979  | 88723  | 80129  | 22653  |        |
|                 | GGGTGTC  | 13.953 | 19.592 | 6.5567 | 12.469 | 15.969 |        |        |        |        |        |        |        |        |        |        |
|                 |          |        |        |        |        |        |        |        |        |        |        |        |        |        |        |        |
| PC-3p-43684_8   | T        | 9558   | 45212  | 45267  | 8859   | 61522  |        |        |        |        |        |        |        |        |        |        |
|                 | AAAACCC  |        |        |        |        |        |        |        |        |        |        |        |        |        |        |        |
|                 | GCATGAA  |        |        |        |        |        |        |        |        |        |        |        |        |        |        |        |
| PC-3p-43684_8   | CTTTTTTG | 7.2353 | 6.3789 | 4.0979 |        | 0      | 10.480 | 19.155 | 6.0166 | 9.4129 | 6.9218 | 4.9838 | 0      | 0      | 7.0134 | 5.1260 |
|                 |          |        |        |        |        |        |        |        |        |        |        |        |        |        |        |        |
|                 | G        | 84491  | 379    | 65792  | 0      |        | 24656  | 00698  | 51949  | 53136  | 66427  | 27183  |        |        | 76245  | 32617  |

|                   |                     |        |        |        |        |        |        |        |        |        |        |        |        |        |        |        |
|-------------------|---------------------|--------|--------|--------|--------|--------|--------|--------|--------|--------|--------|--------|--------|--------|--------|--------|
| PC-5p-<br>18419_2 | AGTTGAG<br>GCTCCGA  | 17.571 | 48.297 | 22.129 | 19.271 | 29.277 | 40.968 | 103.43 | 61.670 | 54.124 | 41.531 | 14.120 | 22.648 | 15.012 | 35.944 | 0      |
| 85                | GCTTTGGT            | 64805  | 67267  | 01528  | 64184  | 6279   | 23654  | 70377  | 68247  | 48053  | 19856  | 84369  | 07562  | 34433  | 06576  |        |
| PC-5p-<br>24127_2 | CTATGGTT<br>TTCTGAG | 13.437 | 29.160 | 24.587 | 32.875 | 50.570 | 16.196 | 12.770 | 15.793 | 0      | 19.776 | 21.596 | 13.211 | 9.3827 | 29.807 | 23.921 |
| 09                | GAT<br>GAGGGTT      | 14263  | 85897  | 79475  | 15373  | 44818  | 74468  | 00465  | 71137  |        | 76122  | 58446  | 37745  | 15207  | 27404  | 48555  |
| PC-5p-<br>3628_17 | TGGGTTT<br>GGTCGTG  | 200.52 | 68.345 | 116.38 | 97.491 | 86.945 | 235.32 | 287.32 | 459.52 | 108.24 | 285.77 | 115.45 | 66.056 | 91.950 | 255.11 | 229.81 |
| 84                | GGA                 | 3513   | 76322  | 22285  | 83519  | 68284  | 91727  | 51047  | 17926  | 89611  | 41996  | 86631  | 88723  | 60903  | 51984  | 7129   |
| PC-5p-<br>43003_9 | TGGTGGG<br>ACCGAGT  | 5.1681 | 6.3789 | 7.3763 | 10.202 | 8.8720 | 5.7164 | 0      | 10.529 | 10.589 | 7.9107 | 0      | 0      | 0      | 6.1367 | 5.9803 |
| 1                 | CCTGGGT             | 31779  | 379    | 38425  | 63391  | 08453  | 98122  |        | 14091  | 57228  | 04488  |        |        |        | 91714  | 71386  |
| PC-5p-<br>48419_7 | CGCAGAG<br>GCGGGAG  |        |        |        |        |        |        |        |        |        |        |        |        |        |        |        |
| 2                 | GTATGAC<br>CT       | 5.1681 | 9.1127 | 13.113 | 17.004 | 11.533 | 8.5747 | 28.094 | 3.7604 | 8.2363 | 6.9218 | 7.4757 | 0      | 0      | 7.0134 | 5.1260 |
|                   |                     | 31779  | 68429  | 49053  | 38986  | 61099  | 47183  | 01024  | 07468  | 33994  | 66427  | 40775  |        |        | 76245  | 32617  |
| PC-5p-<br>49834_6 | AACCCGG<br>TCCGCCTC |        |        | 4.0979 |        |        | 0      | 6.3850 | 29.331 | 0      | 11.866 | 7.4757 | 4.7183 | 15.012 | 23.670 | 34.173 |
| 8                 | CCCCCG              | 0      | 0      | 65792  | 0      | 0      |        | 02327  | 17825  |        | 05673  | 40775  | 49088  | 34433  | 48233  | 55078  |
| PC-5p-<br>53455_5 | AAGAGGG<br>TAACTAT  |        |        |        |        |        |        |        |        |        |        |        |        |        |        |        |
| 9                 | ACAGTGA             |        |        | 2.8685 |        |        | 6.1928 | 0      | 5.2645 | 3.5298 | 2.9665 | 5.3991 | 0      | 0      | 2.1917 | 0      |
|                   | A                   | 0      | 0      | 76054  | 0      | 0      | 72966  |        | 70455  | 57426  | 14183  | 46115  |        |        | 11327  |        |
| PC-5p-<br>62000_4 | AGCTGGA<br>GACTACT  |        |        |        |        |        |        |        |        |        |        |        |        |        |        |        |
| 2                 | GAAGTGA<br>C        | 0      | 0      | 0      | 0      | 0      | 0      | 7.6620 | 13.537 | 12.942 | 6.9218 | 0      | 0      | 0      | 0      | 0      |
|                   |                     |        |        |        |        |        |        | 02792  | 46688  | 81056  | 66427  |        |        |        |        |        |



**Table S6:** The enriched KEGG pathway of differentially expressed miRNAs in goat colon from D10 to D31

| Pathway Id | Pathway description                                      | S gene number | TS gene number | B gene number | TB gene number | <i>P</i> -value of Fisher's Exact Test |
|------------|----------------------------------------------------------|---------------|----------------|---------------|----------------|----------------------------------------|
| ko04010    | MAPK signaling pathway                                   | 1,254         | 18,333         | 1,719         | 29,837         | 3.44E-25                               |
| ko04931    | Insulin resistance                                       | 470           | 18,333         | 605           | 29,837         | 5.46E-18                               |
| ko04910    | Insulin signaling pathway                                | 439           | 18,333         | 566           | 29,837         | 1.13E-16                               |
| ko04810    | Regulation of actin cytoskeleton                         | 1,074         | 18,333         | 1,511         | 29,837         | 5.51E-16                               |
| ko05166    | HTLV-I infection                                         | 533           | 18,333         | 725           | 29,837         | 2.76E-12                               |
| ko04510    | Focal adhesion                                           | 1,074         | 18,333         | 1,542         | 29,837         | 3.14E-12                               |
| ko04360    | Axon guidance                                            | 516           | 18,333         | 702           | 29,837         | 6.46E-12                               |
| ko04390    | Hippo signaling pathway                                  | 403           | 18,333         | 536           | 29,837         | 7.53E-12                               |
| ko05100    | Bacterial invasion of epithelial cells                   | 229           | 18,333         | 286           | 29,837         | 7.92E-12                               |
| ko05205    | Proteoglycans in cancer                                  | 524           | 18,333         | 717           | 29,837         | 2.12E-11                               |
| ko04012    | ErbB signaling pathway                                   | 669           | 18,333         | 934           | 29,837         | 2.18E-11                               |
| ko04514    | Cell adhesion molecules                                  | 508           | 18,333         | 694           | 29,837         | 2.83E-11                               |
| ko04310    | Wnt signaling pathway                                    | 505           | 18,333         | 690           | 29,837         | 3.36E-11                               |
| ko05200    | Pathways in cancer                                       | 834           | 18,333         | 1,188         | 29,837         | 7.66E-11                               |
| ko05202    | Transcriptional misregulation in cancers                 | 613           | 18,333         | 855           | 29,837         | 1.16E-10                               |
| ko04071    | Sphingolipid signaling pathway                           | 273           | 18,333         | 356           | 29,837         | 5.59E-10                               |
| ko04068    | FoxO signaling pathway                                   | 454           | 18,333         | 625           | 29,837         | 1.81E-09                               |
| ko00562    | Inositol phosphate metabolism                            | 202           | 18,333         | 258           | 29,837         | 4.77E-09                               |
| ko04320    | Dorso-ventral axis formation                             | 263           | 18,333         | 346           | 29,837         | 5.25E-09                               |
| ko04520    | Adherens junction                                        | 445           | 18,333         | 615           | 29,837         | 6.04E-09                               |
| ko04666    | Fc gamma R-mediated phagocytosis                         | 238           | 18,333         | 311           | 29,837         | 9.65E-09                               |
| ko00310    | Lysine degradation                                       | 228           | 18,333         | 297           | 29,837         | 1.21E-08                               |
| ko03420    | Nucleotide excision repair                               | 290           | 18,333         | 389           | 29,837         | 2.66E-08                               |
| ko04550    | Signaling pathways regulating pluripotency of stem cells | 424           | 18,333         | 590           | 29,837         | 5.29E-08                               |
| ko05217    | Basal cell carcinoma                                     | 134           | 18,333         | 167           | 29,837         | 1.30E-07                               |
| ko04660    | T cell receptor signaling pathway                        | 218           | 18,333         | 290           | 29,837         | 4.66E-07                               |
| ko04070    | Phosphatidylinositol signaling system                    | 298           | 18,333         | 412           | 29,837         | 1.94E-06                               |
| ko04380    | Osteoclast differentiation                               | 267           | 18,333         | 366           | 29,837         | 2.11E-06                               |

|         |                                                      |       |        |       |        |          |
|---------|------------------------------------------------------|-------|--------|-------|--------|----------|
| ko04933 | AGE-RAGE signaling pathway in diabetic complications | 277   | 18,333 | 382   | 29,837 | 3.13E-06 |
| ko05213 | Endometrial cancer                                   | 131   | 18,333 | 169   | 29,837 | 6.03E-06 |
| ko04152 | AMPK signaling pathway                               | 265   | 18,333 | 366   | 29,837 | 6.14E-06 |
| ko04062 | Chemokine signaling pathway                          | 324   | 18,333 | 455   | 29,837 | 7.03E-06 |
| ko04144 | Endocytosis                                          | 1,033 | 18,333 | 1,550 | 29,837 | 7.43E-06 |
| ko05220 | Chronic myeloid leukemia                             | 167   | 18,333 | 222   | 29,837 | 9.11E-06 |
| ko04664 | Fc epsilon RI signaling pathway                      | 149   | 18,333 | 196   | 29,837 | 1.01E-05 |
| ko04022 | cGMP - PKG signaling pathway                         | 347   | 18,333 | 492   | 29,837 | 1.35E-05 |
| ko04014 | Ras signaling pathway                                | 504   | 18,333 | 733   | 29,837 | 1.78E-05 |
| ko04370 | VEGF signaling pathway                               | 185   | 18,333 | 250   | 29,837 | 1.79E-05 |
| ko04072 | Phospholipase D signaling pathway                    | 307   | 18,333 | 433   | 29,837 | 2.12E-05 |
| ko04150 | mTOR signaling pathway                               | 217   | 18,333 | 298   | 29,837 | 2.21E-05 |
| ko04120 | Ubiquitin mediated proteolysis                       | 588   | 18,333 | 864   | 29,837 | 2.43E-05 |
| ko04151 | PI3K-Akt signaling pathway                           | 618   | 18,333 | 911   | 29,837 | 2.72E-05 |
| ko04611 | Platelet activation                                  | 252   | 18,333 | 351   | 29,837 | 2.78E-05 |
| ko05210 | Colorectal cancer                                    | 156   | 18,333 | 209   | 29,837 | 3.65E-05 |
| ko05215 | Prostate cancer                                      | 209   | 18,333 | 289   | 29,837 | 6.30E-05 |
| ko04214 | Apoptosis - fly                                      | 64    | 18,333 | 78    | 29,837 | 6.98E-05 |
| ko05206 | MicroRNAs in cancer                                  | 419   | 18,333 | 610   | 29,837 | 1.00E-04 |
| ko04020 | Calcium signaling pathway                            | 466   | 18,333 | 685   | 29,837 | 1.70E-04 |
| ko04211 | Longevity regulating pathway - mammal                | 191   | 18,333 | 265   | 29,837 | 1.73E-04 |
| ko04723 | Retrograde endocannabinoid signaling                 | 203   | 18,333 | 284   | 29,837 | 2.38E-04 |
| ko04015 | Rap1 signaling pathway                               | 492   | 18,333 | 727   | 29,837 | 2.40E-04 |
| ko05218 | Melanoma                                             | 152   | 18,333 | 208   | 29,837 | 2.67E-04 |
| ko05032 | Morphine addiction                                   | 166   | 18,333 | 229   | 29,837 | 2.81E-04 |
| ko04916 | Melanogenesis                                        | 254   | 18,333 | 362   | 29,837 | 3.04E-04 |
| ko04662 | B cell receptor signaling pathway                    | 165   | 18,333 | 228   | 29,837 | 3.34E-04 |
| ko04921 | Oxytocin signaling pathway                           | 336   | 18,333 | 488   | 29,837 | 3.55E-04 |
| ko05222 | Small cell lung cancer                               | 189   | 18,333 | 265   | 29,837 | 4.61E-04 |
| ko05014 | Amyotrophic lateral sclerosis                        | 107   | 18,333 | 143   | 29,837 | 4.94E-04 |
| ko05212 | Pancreatic cancer                                    | 134   | 18,333 | 183   | 29,837 | 5.20E-04 |
| ko04728 | Dopaminergic synapse                                 | 278   | 18,333 | 403   | 29,837 | 9.10E-04 |

|         |                                                                         |     |        |       |        |          |
|---------|-------------------------------------------------------------------------|-----|--------|-------|--------|----------|
| ko00532 | Glycosaminoglycan biosynthesis - chondroitin sulfate / dermatan sulfate | 50  | 18,333 | 62    | 29,837 | 9.51E-04 |
| ko00460 | Cyanoamino acid metabolism                                              | 36  | 18,333 | 43    | 29,837 | 1.37E-03 |
| ko05216 | Thyroid cancer                                                          | 101 | 18,333 | 137   | 29,837 | 1.66E-03 |
| ko00230 | Purine metabolism                                                       | 359 | 18,333 | 531   | 29,837 | 1.70E-03 |
| ko04110 | Cell cycle                                                              | 395 | 18,333 | 588   | 29,837 | 2.07E-03 |
| ko04710 | Circadian rhythm                                                        | 80  | 18,333 | 107   | 29,837 | 2.51E-03 |
| ko05120 | Epithelial cell signaling in Helicobacter pylori infection              | 16  | 18,333 | 17    | 29,837 | 2.95E-03 |
| ko05231 | Choline metabolism in cancer                                            | 210 | 18,333 | 304   | 29,837 | 3.23E-03 |
| ko00603 | Glycosphingolipid biosynthesis - globo series                           | 43  | 18,333 | 54    | 29,837 | 3.42E-03 |
| ko04350 | TGF-beta signaling pathway                                              | 263 | 18,333 | 386   | 29,837 | 3.53E-03 |
| ko05211 | Renal cell carcinoma                                                    | 123 | 18,333 | 172   | 29,837 | 3.60E-03 |
| ko05219 | Bladder cancer                                                          | 79  | 18,333 | 107   | 29,837 | 4.75E-03 |
| ko05223 | Non-small cell lung cancer                                              | 127 | 18,333 | 179   | 29,837 | 4.88E-03 |
| ko05230 | Central carbon metabolism in cancer                                     | 146 | 18,333 | 208   | 29,837 | 5.14E-03 |
| ko00232 | Caffeine metabolism                                                     | 34  | 18,333 | 42    | 29,837 | 5.58E-03 |
| ko04261 | Adrenergic signaling in cardiomyocytes                                  | 407 | 18,333 | 613   | 29,837 | 5.85E-03 |
| ko05221 | Acute myeloid leukemia                                                  | 143 | 18,333 | 204   | 29,837 | 6.02E-03 |
| ko04914 | Progesterone-mediated oocyte maturation                                 | 227 | 18,333 | 333   | 29,837 | 6.13E-03 |
| ko00920 | Sulfur metabolism                                                       | 36  | 18,333 | 45    | 29,837 | 6.31E-03 |
| ko04919 | Thyroid hormone signaling pathway                                       | 243 | 18,333 | 358   | 29,837 | 6.47E-03 |
| ko00750 | Vitamin B6 metabolism                                                   | 14  | 18,333 | 15    | 29,837 | 6.98E-03 |
| ko05412 | Arrhythmogenic right ventricular cardiomyopathy                         | 227 | 18,333 | 334   | 29,837 | 7.56E-03 |
| ko04960 | Aldosterone-regulated sodium reabsorption                               | 101 | 18,333 | 142   | 29,837 | 1.00E-02 |
| ko04064 | NF-kappa B signaling pathway                                            | 191 | 18,333 | 280   | 29,837 | 1.07E-02 |
| ko05214 | Glioma                                                                  | 146 | 18,333 | 211   | 29,837 | 1.14E-02 |
| ko00730 | Thiamine metabolism                                                     | 9   | 18,333 | 9     | 29,837 | 1.25E-02 |
| ko03018 | RNA degradation                                                         | 262 | 18,333 | 391   | 29,837 | 1.25E-02 |
| ko00430 | Taurine and hypotaurine metabolism                                      | 21  | 18,333 | 25    | 29,837 | 1.37E-02 |
| ko00062 | Fatty acid elongation                                                   | 53  | 18,333 | 72    | 29,837 | 2.07E-02 |
| ko05132 | Salmonella infection                                                    | 210 | 18,333 | 313   | 29,837 | 2.16E-02 |
| ko04725 | Cholinergic synapse                                                     | 206 | 18,333 | 307   | 29,837 | 2.26E-02 |
| ko04530 | Tight junction                                                          | 648 | 18,333 | 1,005 | 29,837 | 2.36E-02 |

|         |                                                               |     |        |     |        |          |
|---------|---------------------------------------------------------------|-----|--------|-----|--------|----------|
| ko00270 | Cysteine and methionine metabolism                            | 99  | 18,333 | 142 | 29,837 | 2.46E-02 |
| ko00534 | Glycosaminoglycan biosynthesis - heparan sulfate /<br>heparin | 52  | 18,333 | 71  | 29,837 | 2.52E-02 |
| ko04912 | GnRH signaling pathway                                        | 234 | 18,333 | 352 | 29,837 | 2.81E-02 |
| ko00670 | One carbon pool by folate                                     | 39  | 18,333 | 52  | 29,837 | 2.84E-02 |
| ko05142 | Chagas disease                                                | 185 | 18,333 | 276 | 29,837 | 3.10E-02 |
| ko04727 | GABAergic synapse                                             | 169 | 18,333 | 252 | 29,837 | 3.69E-02 |
| ko04721 | Synaptic vesicle cycle                                        | 142 | 18,333 | 210 | 29,837 | 3.69E-02 |
| ko04668 | TNF signaling pathway                                         | 211 | 18,333 | 318 | 29,837 | 3.92E-02 |
| ko04141 | Protein processing in endoplasmic reticulum                   | 416 | 18,333 | 642 | 29,837 | 4.18E-02 |
| ko04130 | SNARE interactions in vesicular transport                     | 51  | 18,333 | 71  | 29,837 | 4.46E-02 |
| ko05033 | Nicotine addiction                                            | 74  | 18,333 | 106 | 29,837 | 4.55E-02 |

---

**Table S7:** The enriched KEGG pathway of highly expressed miRNAs in goat colon from D10 to D31

| Pathway | S gene                                | TS gene | B gene | TB gene | <i>P</i> -value of Fisher's Exact |          |
|---------|---------------------------------------|---------|--------|---------|-----------------------------------|----------|
| Id      | Pathway description                   | number  | number | number  | Test                              |          |
| ko04310 | Wnt signaling pathway                 | 609     | 21,529 | 690     | 29,837                            | 3.12E-25 |
| ko04514 | Cell adhesion molecules               | 606     | 21,529 | 694     | 29,837                            | 2.03E-22 |
| ko04010 | MAPK signaling pathway                | 1,392   | 21,529 | 1,719   | 29,837                            | 1.91E-18 |
| ko04520 | Adherens junction                     | 531     | 21,529 | 615     | 29,837                            | 1.61E-17 |
| ko04530 | Tight junction                        | 824     | 21,529 | 1,005   | 29,837                            | 1.07E-13 |
| ko04360 | Axon guidance                         | 582     | 21,529 | 702     | 29,837                            | 1.09E-11 |
| ko04931 | Insulin resistance                    | 506     | 21,529 | 605     | 29,837                            | 1.48E-11 |
| ko05200 | Pathways in cancer                    | 955     | 21,529 | 1,188   | 29,837                            | 1.52E-11 |
| ko05166 | HTLV-I infection                      | 599     | 21,529 | 725     | 29,837                            | 1.87E-11 |
| ko04320 | Dorso-ventral axis formation          | 301     | 21,529 | 346     | 29,837                            | 2.21E-11 |
| ko04390 | Hippo signaling pathway               | 449     | 21,529 | 536     | 29,837                            | 1.29E-10 |
| ko04070 | Phosphatidylinositol signaling system | 350     | 21,529 | 412     | 29,837                            | 4.47E-10 |
| ko04510 | Focal adhesion                        | 1,215   | 21,529 | 1,542   | 29,837                            | 5.43E-10 |
| ko05212 | Pancreatic cancer                     | 165     | 21,529 | 183     | 29,837                            | 1.83E-09 |
| ko04120 | Ubiquitin mediated proteolysis        | 695     | 21,529 | 864     | 29,837                            | 7.51E-09 |
| ko04910 | Insulin signaling pathway             | 466     | 21,529 | 566     | 29,837                            | 8.24E-09 |
| ko04810 | Regulation of actin cytoskeleton      | 1,184   | 21,529 | 1,511   | 29,837                            | 9.42E-09 |
| ko05205 | Proteoglycans in cancer               | 582     | 21,529 | 717     | 29,837                            | 9.83E-09 |
| ko03420 | Nucleotide excision repair            | 327     | 21,529 | 389     | 29,837                            | 1.91E-08 |
| ko00562 | Inositol phosphate metabolism         | 223     | 21,529 | 258     | 29,837                            | 2.97E-08 |
| ko04014 | Ras signaling pathway                 | 592     | 21,529 | 733     | 29,837                            | 3.16E-08 |
| ko04068 | FoxO signaling pathway                | 509     | 21,529 | 625     | 29,837                            | 3.48E-08 |
| ko04660 | T cell receptor signaling pathway     | 248     | 21,529 | 290     | 29,837                            | 4.31E-08 |
| ko05215 | Prostate cancer                       | 247     | 21,529 | 289     | 29,837                            | 5.13E-08 |
| ko05220 | Chronic myeloid leukemia              | 193     | 21,529 | 222     | 29,837                            | 9.49E-08 |
| ko04720 | Long-term potentiation                | 200     | 21,529 | 231     | 29,837                            | 1.14E-07 |
| ko05211 | Renal cell carcinoma                  | 152     | 21,529 | 172     | 29,837                            | 2.10E-07 |
| ko04921 | Oxytocin signaling pathway            | 400     | 21,529 | 488     | 29,837                            | 2.49E-07 |
| ko04012 | ErbB signaling pathway                | 739     | 21,529 | 934     | 29,837                            | 4.32E-07 |
| ko05206 | MicroRNAs in cancer                   | 492     | 21,529 | 610     | 29,837                            | 6.15E-07 |
| ko04114 | Oocyte meiosis                        | 355     | 21,529 | 434     | 29,837                            | 1.73E-06 |

|         |                                                            |       |        |       |        |          |
|---------|------------------------------------------------------------|-------|--------|-------|--------|----------|
| ko04916 | Melanogenesis                                              | 299   | 21,529 | 362   | 29,837 | 2.13E-06 |
| ko04330 | Notch signaling pathway                                    | 248   | 21,529 | 297   | 29,837 | 2.88E-06 |
| ko04350 | TGF-beta signaling pathway                                 | 317   | 21,529 | 386   | 29,837 | 3.02E-06 |
| ko00601 | Glycosphingolipid biosynthesis - lacto and neolacto series | 87    | 21,529 | 96    | 29,837 | 7.96E-06 |
| ko04728 | Dopaminergic synapse                                       | 327   | 21,529 | 403   | 29,837 | 1.71E-05 |
| ko05214 | Glioma                                                     | 177   | 21,529 | 211   | 29,837 | 4.27E-05 |
| ko00533 | Glycosaminoglycan biosynthesis - keratan sulfate           | 50    | 21,529 | 53    | 29,837 | 4.79E-05 |
| ko04550 | Signaling pathways regulating pluripotency of stem cells   | 467   | 21,529 | 590   | 29,837 | 5.10E-05 |
| ko04662 | B cell receptor signaling pathway                          | 190   | 21,529 | 228   | 29,837 | 5.15E-05 |
| ko05217 | Basal cell carcinoma                                       | 142   | 21,529 | 167   | 29,837 | 6.04E-05 |
| ko04110 | Cell cycle                                                 | 465   | 21,529 | 588   | 29,837 | 6.21E-05 |
| ko04919 | Thyroid hormone signaling pathway                          | 290   | 21,529 | 358   | 29,837 | 6.37E-05 |
| ko04072 | Phospholipase D signaling pathway                          | 347   | 21,529 | 433   | 29,837 | 7.38E-05 |
| ko04933 | AGE-RAGE signaling pathway in diabetic complications       | 308   | 21,529 | 382   | 29,837 | 7.69E-05 |
| ko05219 | Bladder cancer                                             | 94    | 21,529 | 107   | 29,837 | 7.71E-05 |
| ko04727 | GABAergic synapse                                          | 208   | 21,529 | 252   | 29,837 | 7.84E-05 |
| ko04724 | Glutamatergic synapse                                      | 257   | 21,529 | 316   | 29,837 | 9.65E-05 |
| ko04713 | Circadian entrainment                                      | 249   | 21,529 | 306   | 29,837 | 1.15E-04 |
| ko04723 | Retrograde endocannabinoid signaling                       | 232   | 21,529 | 284   | 29,837 | 1.20E-04 |
| ko00062 | Fatty acid elongation                                      | 65    | 21,529 | 72    | 29,837 | 1.56E-04 |
| ko04144 | Endocytosis                                                | 1,180 | 21,529 | 1,550 | 29,837 | 1.56E-04 |
| ko00232 | Caffeine metabolism                                        | 40    | 21,529 | 42    | 29,837 | 1.61E-04 |
| ko04925 | Aldosterone synthesis and secretion                        | 226   | 21,529 | 277   | 29,837 | 1.70E-04 |
| ko04380 | Osteoclast differentiation                                 | 294   | 21,529 | 366   | 29,837 | 1.84E-04 |
| ko00310 | Lysine degradation                                         | 241   | 21,529 | 297   | 29,837 | 2.07E-04 |
| ko04015 | Rap1 signaling pathway                                     | 566   | 21,529 | 727   | 29,837 | 2.32E-04 |
| ko05412 | Arrhythmogenic right ventricular cardiomyopathy            | 269   | 21,529 | 334   | 29,837 | 2.44E-04 |
| ko04668 | TNF signaling pathway                                      | 256   | 21,529 | 318   | 29,837 | 3.59E-04 |
| ko00920 | Sulfur metabolism                                          | 42    | 21,529 | 45    | 29,837 | 4.08E-04 |
| ko05210 | Colorectal cancer                                          | 172   | 21,529 | 209   | 29,837 | 4.24E-04 |
| ko05031 | Amphetamine addiction                                      | 182   | 21,529 | 222   | 29,837 | 4.34E-04 |
| ko04725 | Cholinergic synapse                                        | 247   | 21,529 | 307   | 29,837 | 4.83E-04 |
| ko05218 | Melanoma                                                   | 171   | 21,529 | 208   | 29,837 | 4.87E-04 |
| ko05230 | Central carbon metabolism in cancer                        | 171   | 21,529 | 208   | 29,837 | 4.87E-04 |

|         |                                                                         |     |        |     |        |          |
|---------|-------------------------------------------------------------------------|-----|--------|-----|--------|----------|
| ko04022 | cGMP - PKG signaling pathway                                            | 386 | 21,529 | 492 | 29,837 | 7.78E-04 |
| ko00770 | Pantothenate and CoA biosynthesis                                       | 49  | 21,529 | 54  | 29,837 | 7.87E-04 |
| ko05161 | Hepatitis B                                                             | 287 | 21,529 | 361 | 29,837 | 7.93E-04 |
| ko05221 | Acute myeloid leukemia                                                  | 167 | 21,529 | 204 | 29,837 | 8.41E-04 |
| ko04141 | Protein processing in endoplasmic reticulum                             | 498 | 21,529 | 642 | 29,837 | 9.40E-04 |
| ko04664 | Fc epsilon RI signaling pathway                                         | 160 | 21,529 | 196 | 29,837 | 1.37E-03 |
| ko00532 | Glycosaminoglycan biosynthesis - chondroitin sulfate / dermatan sulfate | 55  | 21,529 | 62  | 29,837 | 1.46E-03 |
| ko05130 | Pathogenic Escherichia coli infection                                   | 37  | 21,529 | 40  | 29,837 | 1.49E-03 |
| ko04146 | Peroxisome                                                              | 227 | 21,529 | 284 | 29,837 | 1.57E-03 |
| ko00270 | Cysteine and methionine metabolism                                      | 118 | 21,529 | 142 | 29,837 | 1.61E-03 |
| ko04922 | Glucagon signaling pathway                                              | 288 | 21,529 | 365 | 29,837 | 1.84E-03 |
| ko05202 | Transcriptional misregulation in cancers                                | 654 | 21,529 | 855 | 29,837 | 2.03E-03 |
| ko05223 | Non-small cell lung cancer                                              | 146 | 21,529 | 179 | 29,837 | 2.32E-03 |
| ko00460 | Cyanoamino acid metabolism                                              | 39  | 21,529 | 43  | 29,837 | 2.88E-03 |
| ko04214 | Apoptosis - fly                                                         | 67  | 21,529 | 78  | 29,837 | 3.16E-03 |
| ko04211 | Longevity regulating pathway - mammal                                   | 211 | 21,529 | 265 | 29,837 | 3.20E-03 |
| ko05120 | Epithelial cell signaling in Helicobacter pylori infection              | 17  | 21,529 | 17  | 29,837 | 3.89E-03 |
| ko00514 | Other types of O-glycan biosynthesis                                    | 91  | 21,529 | 109 | 29,837 | 4.05E-03 |
| ko04020 | Calcium signaling pathway                                               | 525 | 21,529 | 685 | 29,837 | 4.07E-03 |
| ko00564 | Glycerophospholipid metabolism                                          | 261 | 21,529 | 332 | 29,837 | 4.18E-03 |
| ko04071 | Sphingolipid signaling pathway                                          | 279 | 21,529 | 356 | 29,837 | 4.30E-03 |
| ko04611 | Platelet activation                                                     | 275 | 21,529 | 351 | 29,837 | 4.69E-03 |
| ko04512 | ECM-receptor interaction                                                | 344 | 21,529 | 443 | 29,837 | 4.74E-03 |
| ko05213 | Endometrial cancer                                                      | 137 | 21,529 | 169 | 29,837 | 4.85E-03 |
| ko05014 | Amyotrophic lateral sclerosis                                           | 117 | 21,529 | 143 | 29,837 | 4.95E-03 |
| ko05169 | Epstein-Barr virus infection                                            | 423 | 21,529 | 549 | 29,837 | 5.01E-03 |
| ko05160 | Hepatitis C                                                             | 250 | 21,529 | 319 | 29,837 | 6.61E-03 |
| ko04540 | Gap junction                                                            | 224 | 21,529 | 285 | 29,837 | 7.71E-03 |
| ko04914 | Progesterone-mediated oocyte maturation                                 | 260 | 21,529 | 333 | 29,837 | 7.98E-03 |
| ko05231 | Choline metabolism in cancer                                            | 238 | 21,529 | 304 | 29,837 | 8.62E-03 |
| ko04912 | GnRH signaling pathway                                                  | 274 | 21,529 | 352 | 29,837 | 8.71E-03 |
| ko01040 | Biosynthesis of unsaturated fatty acids                                 | 61  | 21,529 | 72  | 29,837 | 9.25E-03 |
| ko05145 | Toxoplasmosis                                                           | 231 | 21,529 | 295 | 29,837 | 9.40E-03 |

|         |                                                            |     |        |     |        |          |
|---------|------------------------------------------------------------|-----|--------|-----|--------|----------|
| ko05032 | Morphine addiction                                         | 181 | 21,529 | 229 | 29,837 | 1.04E-02 |
| ko04024 | cAMP signaling pathway                                     | 476 | 21,529 | 624 | 29,837 | 1.05E-02 |
| ko00534 | Glycosaminoglycan biosynthesis - heparan sulfate / heparin | 60  | 21,529 | 71  | 29,837 | 1.10E-02 |
| ko04130 | SNARE interactions in vesicular transport                  | 60  | 21,529 | 71  | 29,837 | 1.10E-02 |
| ko00100 | Steroid biosynthesis                                       | 66  | 21,529 | 79  | 29,837 | 1.32E-02 |
| ko03013 | RNA transport                                              | 552 | 21,529 | 728 | 29,837 | 1.33E-02 |
| ko00512 | Mucin type O-glycan biosynthesis                           | 68  | 21,529 | 82  | 29,837 | 1.66E-02 |
| ko05020 | Prion diseases                                             | 71  | 21,529 | 86  | 29,837 | 1.76E-02 |
| ko00410 | beta-Alanine metabolism                                    | 67  | 21,529 | 81  | 29,837 | 1.93E-02 |
| ko04710 | Circadian rhythm                                           | 87  | 21,529 | 107 | 29,837 | 1.94E-02 |
| ko04115 | p53 signaling pathway                                      | 227 | 21,529 | 293 | 29,837 | 2.24E-02 |
| ko04911 | Insulin secretion                                          | 246 | 21,529 | 319 | 29,837 | 2.55E-02 |
| ko00510 | N-Glycan biosynthesis                                      | 126 | 21,529 | 159 | 29,837 | 2.55E-02 |
| ko04340 | Hedgehog signaling pathway                                 | 177 | 21,529 | 227 | 29,837 | 2.74E-02 |
| ko04062 | Chemokine signaling pathway                                | 346 | 21,529 | 455 | 29,837 | 3.36E-02 |
| ko03015 | mRNA surveillance pathway                                  | 347 | 21,529 | 457 | 29,837 | 3.76E-02 |
| ko04013 | MAPK signaling pathway - fly                               | 10  | 21,529 | 10  | 29,837 | 3.82E-02 |
| ko05203 | Viral carcinogenesis                                       | 481 | 21,529 | 639 | 29,837 | 4.03E-02 |
| ko04730 | Long-term depression                                       | 145 | 21,529 | 186 | 29,837 | 4.33E-02 |
| ko00120 | Primary bile acid biosynthesis                             | 41  | 21,529 | 49  | 29,837 | 4.53E-02 |
| ko04971 | Gastric acid secretion                                     | 174 | 21,529 | 225 | 29,837 | 4.59E-02 |
| ko04215 | Apoptosis - multiple species                               | 105 | 21,529 | 133 | 29,837 | 4.62E-02 |
| ko00450 | Selenocompound metabolism                                  | 54  | 21,529 | 66  | 29,837 | 4.88E-02 |

---
